# Supplementary material
Source: PubMed Central journal article supplement (PMC7261489)
Supplement: NIHMS1590455-supplement-Supplement1.pdf [file NIHMS1590455-supplement-Supplement1.pdf]

## Supplementary Appendix

This appendix has been provided by the authors to give readers additional information about their work.

Supplement to: Spertus JA, Jones PG, Maron DJ, et al. Health-status outcomes with invasive or conservative care in coronary disease. *N Engl J Med* 2020;382:1408-19. DOI: 10.1056/NEJMoa1916370

# Supplemental Appendices

|    |                                                                                                                                                                                    |    |
|----|------------------------------------------------------------------------------------------------------------------------------------------------------------------------------------|----|
| 1  | ISCHEMIA TRIAL LEADERSHIP AND PERSONNEL .....                                                                                                                                      | 2  |
| 2  | COLLABORATORS.....                                                                                                                                                                 | 15 |
| 3  | SUPPLEMENTAL FIGURE 1: CONSORT DIAGRAM OF PATIENT FLOW .....                                                                                                                       | 56 |
| 4  | SUPPLEMENTAL FIGURE 2: DISTRIBUTIONS OF THE EXPECTED DIFFERENCES IN SEATTLE ANGINA QUESTIONNAIRE SUMMARY SCORES FROM AN INITIALLY INVASIVE STRATEGY .....                          | 57 |
| 5  | SUPPLEMENTAL FIGURE 3: EFFECT OF TREATMENT ON SAQ SUMMARY SCORE, AS A FUNCTION OF PATIENTS' BASELINE ANGINA.....                                                                   | 58 |
| 6  | SUPPLEMENTAL FIGURE 4: EFFECT OF TREATMENT ON SAQ QUALITY OF LIFE SCORE, AS A FUNCTION OF PATIENTS' BASELINE ANGINA.....                                                           | 59 |
| 7  | SUPPLEMENTAL TABLE 1. BASELINE CHARACTERISTICS OF INCLUDED AND EXCLUDED PATIENTS.....                                                                                              | 60 |
| 8  | SUPPLEMENTAL TABLE 2. BRIEF SYMPTOM QUESTIONNAIRE COMPLETION RATES AND REASONS FOR MISSINGNESS.....                                                                                | 63 |
| 9  | SUPPLEMENTAL TABLE 3: ODDS RATIOS (95% HIGHEST POSTERIOR DENSITY INTERVALS) FOR BETTER HEALTH STATUS WITH THE INVASIVE VS. CONSERVATIVE STRATEGY, BY TIME OF FOLLOW UP .....       | 64 |
| 10 | SUPPLEMENTAL TABLE 4: TREATMENT EFFECT ON PREDICTED TIME-AVERAGED SCORES THROUGH 48 MONTHS FOR A TYPICAL PATIENT POSTERIOR MEANS AND 95% HIGHEST POSTERIOR DENSITY INTERVALS ..... | 65 |
| 11 | SUPPLEMENTAL TABLE 5. ODDS RATIOS FOR HIGHER SAQ-7 SUMMARY SCORE WITH THE INVASIVE VS. CONSERVATIVE STRATEGY BASED ON JOINT MODEL WITH SURVIVAL.....                               | 66 |
| 12 | SUPPLEMENTAL TABLE 6 – INTERPRETING THE SAQ-7 AND CLINICALLY-IMPORTANT INTRA-INDIVIDUAL CHANGES IN SCORES.....                                                                     | 67 |
| 13 | SUPPLEMENT 7 – THE 7-ITEM SEATTLE ANGINA QUESTIONNAIRE .....                                                                                                                       | 74 |

## 1 ISCHEMIA Trial Leadership and Personnel

### **Past and Current Committee Members**

#### **Leadership Committee**

Judith S. Hochman (Chair)  
David J. Maron (Co-Chair)  
William Boden (Co-Principal Investigator)  
Bruce Ferguson (Co-Principal Investigator)  
Robert Harrington (Co-Principal Investigator)  
Gregg W. Stone (Co-Principal Investigator)  
David Williams (Co-Principal Investigator)

#### **Executive Committee**

Judith S. Hochman (Chair)  
David J. Maron (Co-Chair)  
Karen P. Alexander  
Sripal Bangalore  
Jeffrey Berger  
William Boden  
Robert Harrington  
Daniel Mark  
Sean M. O'Brien  
Harmony R. Reynolds  
Yves Rosenberg  
Leslee J. Shaw  
John Spertus  
Gregg W. Stone

#### **Steering Committee**

Judith S. Hochman (Chair)  
David J. Maron (Co-Chair)  
*Members of Executive Committee*  
Christie Ballantyne\*  
Daniel Berman  
Rafael Beyar\*  
Balram Bhargava  
Chris Buller\*  
Antonio (Tony) Carvalho\*\*  
Bernard R. Chaitman  
Rafael Diaz\*  
Rolf Doerr  
Vladimir Dzavik  
Bruce Ferguson

Shaun Goodman  
Gilbert Gosselin  
Rory Hachamovitch\*  
Christian Hamm\*  
Claes Held  
Malte Helm\*  
Kurt Huber\*  
Lixin Jiang  
Matyas Keltai  
Shun Kohsaka  
Irene Lang\*  
Renato Lopes  
Jose Lopez-Sendon  
Aldo Maggioni  
John Mancini  
C. Noel Bairey Merz  
James Min  
Eric Peterson\*  
Michael H. Picard  
Witold Ruzyllo  
Joseph Selvanayagam  
Roxy Senior  
Tali Sharir  
Gabriel Steg  
Hanna Szwed  
Frans Van de Werf\*  
William Weintraub  
Harvey White  
David Williams

**Optimal Medical Therapy Committee**

William Boden (Co-Chair)  
David J. Maron (Co-Chair)  
Christie Ballantyne  
Sripal Bangalore  
Karen Calfas \*\*  
Bernard R. Chaitman  
Mary Ann Champagne  
Michael Davidson  
Jerome Fleg  
Peter A. McCullough  
Jonathan Newman  
Peter Stone

**Optimal Revascularization Therapy Planning Committee**

Gregg W. Stone (Chair)

**Subcommittee: CABG**

Bruce Ferguson (Co-Chair)

Philippe Menasche (Co-Chair)

Sripal Bangalore

Michael Davidson\*\*

Stephen Femes

Robert Guyton

Michael Mack

Fred Mohr

Anupama Rao

Joe Sabik

Oz Shapira

David Taggart

James Tatoulis

**Subcommittee: PCI**

David Williams (Co-Chair)

Sripal Bangalore

Jim Blankenship

Sorin Brener

Chris Buller

Antonio Colombo

Bernard de Bruyne

Philippe G n reux

Robert Harrington

Dean Kereiakes

Thierry Lefevre

Jeffrey Moses

**Clinical Events**

**Endpoint Definition Panel**

Bernard R. Chaitman (Chair)

Karen P. Alexander

Judith S. Hochman

Ken Mahaffey

David J. Maron

Gregg W. Stone

Harvey White

**Clinical Event Review Committee**

Bernard R. Chaitman (Chair)

Salvador Cruz-Flores

Nicholas Danchin

Eli Feen

Mario J. Garcia

Paul Hauptman

Abhay A. Laddu

Eugene Passamani

Ileana L. Pina

Maarten Simoons

Hicham Skali

Kristian Thygesen

David Waters

**CEC Administrative Group**

Karen P. Alexander

Patricia Endsley\*

Gerard Esposito

Jeffrey Kanters

John Pownall

Dimitrios Stournaras

**ISCHEMIA Imaging Committee**

Leslee J. Shaw (Chair)

Daniel Berman

Matthias Friedrich

Rory Hachamovitch

Raymond Kwong

John Mancini

James Min

Dana Oliver

Michael H. Picard

Harmony R. Reynolds

**Biostatistics Planning Committee**

Frank Harrell (Chair)

Jeffrey Blume

Kerry Lee

Sean M. O'Brien

**BioRepository Committee**

Jeffrey Berger (Chair)

Claes Held

Iftikhar Kullo

Bruce McManus

Kristin Newby

**EQOL Committee**

Daniel Mark (Co-Chair)  
John Spertus (Co-Chair)  
David Cohen  
William Weintraub

**Recruitment for Women & Minorities**

C. Noel Bairey Merz (Chair)  
Raffaele Bugiardini  
Jelena Celutkiene  
Jorge Escobedo  
Angela Hoye  
Radmila Lyubarova  
Deirdre Mattina  
Jesus Peteiro  
Harmony R. Reynolds  
Paola Smanio

**Publications**

David J. Maron (Chair)  
Karen P. Alexander  
Sripal Bangalore  
Jeffrey Berger  
William Boden  
Robert Harrington  
Judith S. Hochman  
Sean M. O'Brien  
Harmony R. Reynolds  
Yves Rosenberg  
Gregg W. Stone

**Publication Subcommittees**

**Economics**

Daniel Mark (Chair)  
John Spertus

**QOL**

John Spertus (Chair)  
Daniel Mark

**Stress Testing**

Leslee J. Shaw (Chair)  
Dan Berman  
Bernard R. Chaitman

Jerome Fleg  
Raymond Kwong  
Michael H. Picard  
Harmony R. Reynolds  
Roxy Senior

**CCTA**

James Min (Chair)  
Jonathan Leipsic  
John Mancini

**Angiography/Optimal Revascularization Therapy**

Gregg W. Stone (Chair)  
Ziad Ali (Co-chair)  
Sripal Bangalore  
T. Bruce Ferguson  
David Williams

(Philippe Genereux, former Chair, Angiography Subcommittee)\*

**Optimal Medical Therapy**

William Boden (Co-Chair)  
David J. Maron (Co-Chair)  
Jerome Fleg  
Jonathan Newman

**Biorepository**

Jeffrey Berger (Chair)

**CEC**

Bernard R. Chaitman (Chair)  
Karen P. Alexander

**CKD**

Sripal Bangalore (Chair)  
Karen P. Alexander  
Jerome Fleg  
Judith S. Hochman  
David J. Maron  
Roy Mathew  
Sean M. O'Brien  
Harmony R. Reynolds  
Mandeep Sidhu

**CIAO**

Harmony R. Reynolds (Chair)

**DSMB Members**

Lawrence Friedman (Chair)



Jeffrey Anderson  
Jessica Berg \*  
David DeMets  
C. Michael Gibson  
Gervasio Lamas  
Nicole Deming  
Jonathan Himmelfarb  
Pamela Ouyang  
Pamela Woodard

### **Independent Statistical Analysis Center for DSMB Reporting**

Frank Harrell  
Samuel Nwosu

### **NHLBI Program Staff**

#### **Project Office**

Yves Rosenberg (Project Officer)  
Jerome Fleg  
Ruth Kirby

#### **Statisticians**

Neal Jeffries

### **ISCHEMIA Clinical Coordinating Center (CCC)**

#### **Study Leadership**

Judith S. Hochman (Study Chair, Director of CCC)  
David J. Maron (Study Co-Chair, Co-Director of CCC, US Country Leader)

#### **CCC Faculty**

Sripal Bangalore (Optimal Revascularization Therapy CCC Director, Regional Leader)  
Jeffrey Berger (Director of the Biorepository, Regional Leader)  
William Boden (US-VA Regional Leader)  
Jonathan Newman (Optimal Medical Therapy CCC Director, Regional Leader)  
Harmony R. Reynolds (Associate Director of CCC, CCC Imaging Lead, Regional Leader)  
Mandeep Sidhu (US-VA Regional Co-Leader)

#### ***Program Directors***

Jean E. Denaro\*\*  
Stephanie Mavromichalis

#### ***Project Managers***

Kevin Chan  
Gia Cobb\*  
Aira Contreras  
Diana Cukali\*  
Stephanie Ferket\*

Andre Gabriel\*  
Antonietta Hansen\*  
Arline Roberts

***Clinical Research Associates***

Michelle Chang  
Sharder Islam\*  
Graceanne Wayser\*  
Solomon Yakubov\*  
Michelle Yee

***Clinical Trial Assistants***

Caroline Callison  
Isabelle Hogan  
Albertina Qelaj\*  
Charlotte Pirro\*  
Kerrie Van Loo  
Brianna Wisniewski\*

***Grants and Finance Administration***

Margaret Gilsenan (Grants Manager)  
Bevin Lang  
Samaa Mohamed

***Publications Team***

Jihyun Lyo (Publications Manager)  
Nadia Gakou

***Data Analyst***

Vincent Setang\*  
Mark Xavier\*

**Statistical and Data Coordinating Center (SDCC)**

Sean M. O'Brien (Principal Investigator)  
Karen P. Alexander (Co-Principal Investigator)  
Akshay Bagai\*  
Samuel Broderick  
Michelle Crowder  
Derek Cyr  
Patricia Endsley  
Jyotsna Garg  
Xiangqiong Gu  
Robert  
Harrington\*  
Lisa Hatch  
Anne Heath\*  
Zhen Huang

Jeffrey Kanters  
Kerry Lee\*  
Jeff Leimberger  
Jill Marcus  
Courtney Page  
Wanda Parker\*  
Wayne Pennachi  
John Pownall  
Frank Rockhold  
Susanna Stevens  
Allegra Stone  
Dimitrios  
Stournaras  
Omar Thompson  
Sheri Ussery  
Jennifer White\*  
Mary (Kaye)  
Williams  
Weibing Xing  
Songlin Zhu

**Economics and Quality of Life Coordinating Center (EQOL CC)**

*Duke Clinical Research Institute, Durham, NC*

Daniel B. Mark (Principal Investigator)  
Kevin Anstrom  
Khaula Baloch  
Janet Blount  
Patricia Cowper  
Linda Davidson-Ray  
Laura Drew  
Tina Harding  
J David Knight  
Diane Minshall Liu  
Betsy O'Neal  
Thomas Redick

*Saint Luke's Mid America Heart Institute, Kansas City, MO*

John Spertus (Principal Investigator)  
Philip Jones  
Karen Nugent  
Grace Jingyan Wang

## **ISCHEMIA Imaging Coordinating Center (ICC)**

Leslee J. Shaw (Principal Investigator)

Lawrence Phillips

Abhinav Goyal

Holly Hetrick

Dana Oliver

### **Nuclear Core Lab**

Daniel Berman (Director)

Sean W. Hayes (Co-Director)

John D. Friedman

R. James Gerlach

Mark Hyun

Romalisa Miranda-Peats

Piotr Slomka

Louise Thomson

### **CMR Core Lab**

Raymond Y. Kwong (Director)

Matthias Friedrich (Director)\*

Francois Pierre Mongeon (Co-Director)

Steven Michael

### **Echo Core Lab**

Michael H. Picard (Director)

Judy Hung

Marielle Scherrer-Crosbie

Xin Zeng

## **ECG/ETT CoreLab**

Bernard R. Chaitman (Director)

Jane Eckstein

Bandula Guruge

Mary Streif

## **Angiographic Core Lab**

Ziad Ali (Director)

Philippe Genereux (Director)\*

Maria A. Alfonso

Maria P. Corral

Javier J. Garcia

Jennifer Horst

Ivana Jankovic

Maayan Konigstein

Mitchel B. Lustre\*

Yolayfi Peralta  
Raquel Sanchez

### **CCTA Core Lab**

James Min (Director)  
Reza Arsanjani  
Matthew Budoff  
Kimberly Elmore  
Millie Gomez  
Cameron Hague  
Niree Hindoyan  
Jonathan Leipsic  
GB John Mancini  
Rine Nakanishi  
M. Barbara Srichai-Parsia  
Eunice Yeoh  
Tricia Youn

### **Academic Research Organizations (AROs)**

#### **Associazione Nazionale Medici Cardiologi Ospedalieri (ANMCO) -Italy & Switzerland**

Aldo P. Maggioni (Country Leader)  
Francesca Bianchini  
Martina Ceseri  
Andrea Lorimer  
Marco Magnoni  
Francesco Orso  
Laura Sarti  
Martinia Tricoli\*

#### **Brazilian Clinical Research Institute (BCRI) - Brazil**

Antonio Carvalho (Country Leader)\*\*  
Renato Lopes (Country Leader)  
Lilian Mazza Barbosa  
Tauane Bello Duarte  
Tamara Colaiácovo Soares  
Julia de Aveiro Morata  
Pedro Carvalho  
Natalia de Carvalho Maffei  
Flávia Egydio\*  
Anelise Kawakami\*  
Janaina Oliveira\*  
Elissa Restelli Piloto\*  
Jaqueline Pozzibon\*

Canadian Heart Research Centre (CHRC) - Canada

Shaun Goodman (Country Leader)

Diane Camara

Neamat Mowafy

Caroline Spindler

China Oxford Centre for International Health Research - China

Lixin Jiang (Country Leader)

Hao Dai

Fang Feng

Jia Li

Li Li\*

Jiamin Liu

Qiulan Xie

Haibo Zhang

Jianxin Zhang

Lihua Zhang

Liping Zhang

Ning Zhang

Hui Zhong

Estudios Clínicos Latino America (ECLA) - Argentina

Rafael Diaz\*

Claudia Escobar

Maria Eugenia Martin\*

Andrea Pascual\*

Foundation for Biomedical Research of La Paz University Hospital (FIBHULP) - Spain

José Lopez-Sendon (Country Leader)

Paloma Moraga

Victoria Hernandez

Almudena Castro

Maria Posada\*

Sara Fernandez

José Luis Narro Villanueva

Rafael Selgas

French Alliance for Cardiovascular Trials (FACT) - France

Gabriel Steg (Country Leader)

Helene Abergel

Jean Michel Juliard

Green Lane Coordinating Centre Ltd. (GLCC) -Malaysia, New Zealand, Singapore, Taiwan, Thailand

Harvey White (Country Leader)

Caroline Alsweiler

KU Leuven Research & Development - Belgium\*

Frans Van de Werf (Country Leader)

Kathleen Claes

Kaatje Goetschalckx

Ann Luyten

Valerie Robesyn

South Australian Health and Medical Research Institute Ltd (SAHMRI) - Australia

Joseph B. Selvanayagam (Country Leader)

Deirdre Murphy

### **Contract Research Organizations (CROs) for ISCHEMIA Trial**

FOCUS Clinical Research Center d.o.o. Belgrade - Serbia

Nevena Garcevic

Jelena Stojkovic

iProcess Global Research Inc. - India

Asker Ahmed

Richa Bhatt

Nitika Chadha\*

Vijay Kumar\*

Sadath Lubna\*

Pushpa Naik

Shruti Pandey\*

Karthik Ramasamy\*

Mohammed Saleem

Pratiksha Sharma

Hemalata Siddaram\*

*\*past members / past organizations*

*\*\*deceased*

## 2 Collaborators

| Country<br>(No. Randomizations) | Investigator(s)                                                                                                                                                                 | Study Coordinator(s)                                                                        | City & State<br>(if applicable) | Institution (No.<br>Randomizations)                           |
|---------------------------------|---------------------------------------------------------------------------------------------------------------------------------------------------------------------------------|---------------------------------------------------------------------------------------------|---------------------------------|---------------------------------------------------------------|
| *United States (853)            |                                                                                                                                                                                 |                                                                                             |                                 |                                                               |
| Country Leader                  |                                                                                                                                                                                 |                                                                                             |                                 |                                                               |
| David J. Maron, MD              |                                                                                                                                                                                 |                                                                                             |                                 |                                                               |
| Regional Leader for<br>VA Sites |                                                                                                                                                                                 |                                                                                             |                                 |                                                               |
| William E. Boden, MD            |                                                                                                                                                                                 |                                                                                             |                                 |                                                               |
|                                 | Kreton Mavromatis,<br>MD<br>Jason Linefsky, MD                                                                                                                                  | John Doan, MD<br>Raven Lee, CCRP<br>Risha Patel<br>So Yang Cho                              | Decatur, GA                     | Atlanta VA Medical<br>Center (139)                            |
|                                 | Todd Miller, MD                                                                                                                                                                 | Susan Milbrandt<br>Dawn Shelstad                                                            | Rochester,<br>MN                | Mayo Clinic (50)                                              |
|                                 | Subhash Banerjee,<br>MD                                                                                                                                                         | Preeti Kamath, BDS,<br>MHA, CCRP<br>Ishita Tejani, BDS,<br>MS, MSPH<br>Stanley E. Cobos, BA | Dallas, TX                      | V.A. North Texas<br>Health Care System<br>(35)                |
|                                 | Harmony R.<br>Reynolds, MD<br>Jonathan D.<br>Newman, MD, MPH<br>Sripal Bangalore,<br>MD<br>Robert M. Donnino,<br>MD<br>Lawrence M.<br>Phillips, MD<br>Muhamed Saric,<br>MD, PhD | Kirsten J. Quiles, MS<br>Raven R. Dwyer, MPH<br>Dalisa Espinosa, MBS                        | New York, NY                    | NYU Langone<br>Medical Center-<br>Bellevue Hospital<br>(26)   |
|                                 | Khaled Abdul-Nour,<br>MD                                                                                                                                                        | Allison Schley, BS<br>Heather Golden<br>Hermine Osseni, MS<br>Charlene Wiyarand             | Detroit, MI                     | Henry Ford Health<br>System (21)                              |
|                                 | Peter H. Stone, MD                                                                                                                                                              | Peter Douglass, BA<br>Hayley Pomeroy, BA<br>Alexandra Craft, BA<br>Bethany Harvey, BA       | Boston, MA                      | Brigham & Women's<br>Hospital, Harvard<br>Medical School (21) |
|                                 | James J. Jang, MD<br>Gennie Yee, MD                                                                                                                                             | Olivia Anaya<br>Phoebe Goold, RN<br>Steven Giovannone                                       | San Jose, CA                    | Kaiser Permanente<br>San Jose (18)                            |
|                                 | Steven Weitz, MD                                                                                                                                                                | Lori Pritchard, RN                                                                          | Schenectady,<br>NY              | Cardiology<br>Associates of<br>Schenectady P.C.<br>(17)       |



|                                                                                                                                                                                                                                                                                                                                                 |                                                                                                                           |                             |                                                                                                    |
|-------------------------------------------------------------------------------------------------------------------------------------------------------------------------------------------------------------------------------------------------------------------------------------------------------------------------------------------------|---------------------------------------------------------------------------------------------------------------------------|-----------------------------|----------------------------------------------------------------------------------------------------|
| Suzanne Arnold, MD<br>James Henry O'Keefe, Jr, MD (PI from 2012-2016)                                                                                                                                                                                                                                                                           | Rosann Gans, RN<br>Paul Kennedy, RN                                                                                       | Kansas City, MO             | Saint Luke's Hospital (17)                                                                         |
| Michael D. Shapiro, DO                                                                                                                                                                                                                                                                                                                          | Shobana Ganesan, PhD<br>David Schlichting, LPN<br>Aynun Naher                                                             | Portland, OR                | Oregon Health & Science University (17)                                                            |
| Mohammad El-Hajjar, MD<br>Mandeep S. Sidhu, MD, MBA<br>Steven A. Fein, MD<br>Mikhail T. Torosoff, MD, PhD<br>Radmila Lyubarova, MD<br>Sulagna Mookherjee, MD<br>Krzysztof Drzymalski, MD<br>Edward O. McFalls, MD, PhD<br>Santiago A. Garcia, MD<br>Stefan C. Bertog, MD<br>Rizwan A. Siddiqui, MD<br>Areef Ishani, MD<br>Ronnell A. Hansen, MD | Wendy L. Stewart, MS<br>Kristin M. Salmi, BS                                                                              | Albany, NY                  | Albany Medical Center Hospital (16)                                                                |
| Michel Georges Khouri, MD                                                                                                                                                                                                                                                                                                                       | Debra K. Johnson, RN<br>Rebekah R. Herrmann, RN                                                                           | Minneapolis, MN             | Minneapolis VAMC (15)                                                                              |
| Jonathan L. Goldberg, MS, MD                                                                                                                                                                                                                                                                                                                    | Kristine Arges<br>Melissa LeFevre<br>Jennifer Tomfohr<br>Kimberly Ann Byrne<br>Taissa Zappernick                          | Durham, NC<br>Cleveland, OH | Duke University Medical Center (15)<br>Louis Stokes Cleveland Veterans Affairs Medical Center (14) |
| Richard Goldweit, MD                                                                                                                                                                                                                                                                                                                            | Sallie Canada<br>Meghana Kakade<br>Patricia Mieses<br>Stanley E. Cobos, BA<br>Raven R. Dwyer, MPH<br>Dalisa Espinosa, MBS | Englewood, NJ               | Englewood Hospital and Medical Center (13)                                                         |
| Ronny A. Cohen, MD<br>Brooks Mirrer, MD<br>Victor Navarro, MD                                                                                                                                                                                                                                                                                   | Kirsten J. Quiles, MS<br>Magdalena Rantinella, BS<br>Jessica Rodriguez, BS                                                | Brooklyn, NY                | NYU-HHC Woodhull Hospital (12)                                                                     |

|                               |                                                                                      |                   |                                                          |
|-------------------------------|--------------------------------------------------------------------------------------|-------------------|----------------------------------------------------------|
| David E. Winchester, MD, MS   | Olivia Mancilla, BS<br>Susan Stinson, RN                                             | Gainesville, FL   | Malcom Randall VAMC (11)                                 |
| Marvin Kronenberg, MD         | Terry Weyand                                                                         |                   |                                                          |
| Philip Rogal, MD              | Sherron C. Crook                                                                     | Nashville, TN     | Vanderbilt University Medical Center (11)                |
| Christopher McFarren, MD      |                                                                                      |                   |                                                          |
| John F. Heitner, MD           | Jean Ho<br>Saadat Khan<br>Mahmoud Mohamed<br>Mary R. Soltau, RN<br>Delsa K. Rose, RN | Brooklyn, NY      | New York - Presbyterian/Brooklyn Methodist Hospital (10) |
| Ira M. Dauber, MD             | Rebecca J. Wimmer, RN<br>Kathy E. Siegel, RN<br>Susan Derbyshire                     | Littleton, CO     | South Denver Cardiology Associates, P.C. (10)            |
| Charles Cannan, MD            | Michelle Dixon<br>Gerald Leonard<br>Ciarra Heard, LVN                                | Portland, OR      | Providence Heart and Vascular Institute (10)             |
| Sriram Sudarshan, MD          | Viviana Gabriel, LVN<br>Sukie Desire                                                 | Wichita Falls, TX | Wichita Falls Heart Clinic (9)                           |
| Puja K. Mehta, MD             |                                                                                      |                   |                                                          |
| Michael McDaniel, MD          | Fauzia Rashid, PhD                                                                   |                   |                                                          |
| Stamatios Lerakis, MD         | Senait Asier                                                                         | Atlanta, GA       | Emory University (9)                                     |
| Arshed Quyyumi, MD            | Keyur Patel                                                                          |                   |                                                          |
| Nanette K. Wenger, MD         |                                                                                      |                   |                                                          |
| Chester M. Hedgepeth, MD, PhD | Jennifer Gillis, APRN                                                                |                   |                                                          |
| Heather Hurlburt, MD          | Megan Manocchia, RN<br>Susan Moore, RN<br>Elizabeth Congdon<br>Gail Brandt           | Warwick, RI       | Kent Hospital (9)                                        |
| Alan Rosen, MD                |                                                                                      |                   |                                                          |
| Zakir Sahul, MD               | Nora Marchelletta<br>Kristina Wippler                                                | Ypsilanti, MI     | Michigan Heart, PC (9)                                   |
| David Booth, MD               | Yvonne Taul, RN                                                                      |                   |                                                          |
| Steve Leung, MD               | Jennifer Isaacs, MS                                                                  |                   |                                                          |
| Ahmed Abdel-Latif, MD, PhD    | Viktoria Bulkley, RN                                                                 | Lexington, KY     | University of Kentucky (8)                               |
| Hassan Reda, MD               | Caroline Rodgers                                                                     |                   |                                                          |
| Khaled Ziada, MD              |                                                                                      |                   |                                                          |

|                                                                                                                                                                                                      |                                                                                                                     |                               |                                                                                                |
|------------------------------------------------------------------------------------------------------------------------------------------------------------------------------------------------------|---------------------------------------------------------------------------------------------------------------------|-------------------------------|------------------------------------------------------------------------------------------------|
| Sampoornima Setty, MD                                                                                                                                                                                | Kimberly E. Halverson, RHIT<br>Christine Roraff, RN<br>Jonean Thorsen, RN                                           | La Crosse, WI                 | Gundersen Lutheran Medical Center (8)                                                          |
| Rajat S. Barua, MD, PhD                                                                                                                                                                              | Amarachi Ojajuni<br>Oni Olurinde<br>Kamalakar Surineni                                                              | Kansas City, MO               | Kansas City VA Medical Center (8)                                                              |
| Fadi Hage, MD<br>Christiano Caldeira, MD<br>James E. Davies, MD<br>Massoud Leesar, MD<br>Jaekyeong Heo, MD<br>Amy Iskandrian, MD<br>Firas Al Solaiman, MD<br>Satinder Singh, MD<br>Khaled Dajani, MD | Badhma Valaiyapathi, MD                                                                                             | Birmingham, AL                | UAB Vascular Biology and Hypertension Program (8)                                              |
| Mohammad El-Hajjar, MD<br>Paul Der Mesropian, MD<br>Joseph Sacco, MD<br>Brian McCandless, MD<br>Marisa Orgera, MD<br>Mandeep S. Sidhu, MD, MBA (2012-2016 )                                          | Carol M. Kartje, BSN<br><br>Michele Rawlins, NP<br>Jennifer Thomson, MA                                             | Maywood, IL<br><br>Albany, NY | Loyola University Medical Center (8)<br><br>Samuel Stratton VA Medical Center of Albany NY (7) |
| Imran Arif, MD<br>Hanan Kerr, MD                                                                                                                                                                     | Mary Colleen Rogge, RN<br>Julie Bunke , BA<br>Kendra Unterbrink , PA<br>Jacqueline Fannon, RN<br>Cynthia Burman, NP | Cincinnati, OH                | Cincinnati VA Medical Center (7)                                                               |
| Jorge F. Trejo (Gutierrez), MD<br>Gerald Fletcher, MD<br>Gary E. Lane, MD<br>Lynn M. Neeson, DNP<br>Pragnesh P. Parikh, MD<br>Peter M. Pollak, MD                                                    | Marcia F. Dubin, CCRP                                                                                               | Jacksonville, FL              | Mayo Clinic Florida (7)                                                                        |

|                                                                                                                                                                                                                                             |                                                                                                                |                             |                                                              |
|---------------------------------------------------------------------------------------------------------------------------------------------------------------------------------------------------------------------------------------------|----------------------------------------------------------------------------------------------------------------|-----------------------------|--------------------------------------------------------------|
| Brian P. Shapiro,<br>MD<br>Kevin Landolfo, MD<br>Anthony<br>Gemignani, MD<br>Daniel O'Rourke,<br>MD                                                                                                                                         | Sarah Beaudry, RN                                                                                              | White River<br>Junction, VT | VAMC-White River<br>Junction (7)                             |
| Judith L. Meadows,<br>MD                                                                                                                                                                                                                    | Stephanie A. Tirado,<br>RN<br>Janet Halliday<br>Pamela Julian                                                  | West Haven,<br>CT           | VA Connecticut<br>Healthcare System<br>(7)                   |
| Jason T. Call, MD                                                                                                                                                                                                                           | Stephanie, M. Lane,<br>RN, BSN, CCRN<br>Jennifer L. Stanford,<br>RN, MSN                                       | Winchester,<br>VA           | Winchester<br>Cardiology and<br>Vascular Medicine,<br>PC (7) |
| Joseph Hannan,<br>MD<br>Robert Bojar, MD<br>Deepti Kumar, MD<br>John Mukai, MD                                                                                                                                                              | Patricia Arsenault, RN<br>Pamela Sigel, RN                                                                     | Worcester,<br>MA            | Saint Vincent<br>Hospital at Worcester<br>Medical Center (7) |
| Edward T. Martin,<br>MS, MD                                                                                                                                                                                                                 | Miriam Brooks                                                                                                  | Tulsa, OK                   | Oklahoma Heart<br>Institute (7)                              |
| Gabriel Vorobiof,<br>MD                                                                                                                                                                                                                     | Ladda Douangvila<br>Rubine Gevorgyan<br>Fatima Ranjbaran, RN                                                   | Los Angeles,<br>CA          | Ronald Reagan<br>UCLA Medical Center<br>(7)                  |
| Alec Moorman, MD                                                                                                                                                                                                                            | Bryn Smith, BS<br>Carly Ohmart                                                                                 | Seattle, WA                 | University of<br>Washington Medical<br>Center (7)            |
| Scott Kinlay, MBBS,<br>PhD<br>Robert J.<br>Hamburger, MD<br>Thomas P. Rocco,<br>MD<br>Deepak L. Bhatt,<br>MD, MPH<br>Kevin Croce, MD,<br>PhD<br>Jacquelyn A Quin,<br>MD<br>Jati Anumpa, MD<br>Marco Zenati, MD,<br>MSc<br>David P Faxon, MD | Samantha Ly, MA<br>Margot C. Quinn, BA<br>Sara Temiyasathit,<br>PhD<br>Jacquelyn Do, MPH<br>Desiree Tobin, MPH | West<br>Roxbury, MA         | VA Boston<br>Healthcare System<br>(6)                        |
| Glenn Rayos, MD                                                                                                                                                                                                                             | Jennifer Langdon<br>Marcia Werner Bayer<br>Amanda O'Malley                                                     | Daytona<br>Beach, FL        | Daytona Heart Group<br>(6)                                   |
| Ashraf Seedhom,<br>MD<br>Lance Sullenberger,<br>MD                                                                                                                                                                                          | Erin Orvis<br>Mandy Murphy, RN                                                                                 | Albany, NY<br>Bethesda, MD  | Capital Cardiology<br>Associates (6)                         |

|                                 |                                                             |                     |                                                        |
|---------------------------------|-------------------------------------------------------------|---------------------|--------------------------------------------------------|
| Gregory Kumkumian, MD           | Ann Greenberg, RN<br>Margaret Iraola, RN                    |                     | NIH Heart Center at Suburban Hospital (6)              |
| Steven P. Sedlis, MD            |                                                             |                     |                                                        |
| Robert M. Donnino, MD           | Leandro C. Maranan, CCRC                                    | New York, NY        | VA New York Harbor Health Care System (6)              |
| Jeffrey Lorin, MD               |                                                             |                     |                                                        |
| Jacqueline E. Tamis-Holland, MD |                                                             |                     |                                                        |
| Robert Kornberg, MD             | Ammy Malinay, RN                                            | Ridgewood, NJ       | Mount Sinai Saint Luke's Hospital (6)                  |
| Robert Leber, MD                |                                                             |                     |                                                        |
| Souheil Saba, MD                |                                                             |                     |                                                        |
| Michael W. Lee, MD              |                                                             |                     |                                                        |
| Delano R. Small, MD             |                                                             |                     |                                                        |
| Wassim Nona, MD                 | Candice P. Edillo, RN                                       | Southfield, MI      | Providence - Providence Park Hospital (6)              |
| Patrick B. Alexander, MD        |                                                             |                     |                                                        |
| Iram Rehman, MD                 |                                                             |                     |                                                        |
| Umesh Badami, MD                | Ann Ostrander, RN<br>Stephanie Wasmiller, RN                | Saginaw, MI         | Covenant Medical Center, Inc. (5)                      |
| Kevin Marzo, MD                 | Wendy Drewes, RN<br>Dipti Patel, RN                         | Mineola, NY         | NYU Winthrop (5)                                       |
| Inga H. Robbins, MD             |                                                             |                     |                                                        |
| Howard A. Levite, MD            | Jackie M White, RN, BSN<br>CCRC                             | Pomona, NJ          | AtlantiCare Regional Medical Center (5)                |
| Sanjay Shetty, MD               | Alison Hallam                                               |                     |                                                        |
| Mayuri Patel, MD                |                                                             |                     |                                                        |
| Glenn S. Hamroff, MD            | Benjamin J Spooner, RPA-C<br>Linda M Hollenweger, LPN, CCRC | Cortlandt Manor, NY | NYP Medical Medical Group Hudson Valley Cardiology (5) |
| Raymond W. Little, MD           | Holly Little                                                |                     |                                                        |
| Brandi D. Zimbelman, FNP-C      | Tiffany Little                                              | Houston, TX         | Houston Heart & Vascular Associates (5)                |
| Charles Y. Lui, MD              |                                                             |                     |                                                        |
| Brigham R. Smith, MD            |                                                             |                     |                                                        |
| Daniel P. Vezina, MD, MSC       |                                                             |                     |                                                        |
| Lillian L. Khor, MBBCh, MSc     | Nona A Eskelson, RN                                         | Salt Lake City, UT  | Salt Lake City VA Medical Center (4)                   |
| Josephine D. Abraham, MD, MPH   |                                                             |                     |                                                        |
| David A. Bull, MD               |                                                             |                     |                                                        |
| Stephen H. McKellar, MD, MSc    |                                                             |                     |                                                        |

|                                                                                                                         |                                                                                          |                  |                                                     |
|-------------------------------------------------------------------------------------------------------------------------|------------------------------------------------------------------------------------------|------------------|-----------------------------------------------------|
| David Booth, MD<br>John Kotter, MD<br>Ahmed Abdel-Latif, MD, PhD                                                        | Yvonne Taul, RN<br>Caroline Rodgers, RN<br>Jennifer Isaacs, MS<br>Viktoria Bulkley       | Lexington, KY    | Lexington VA Medical Center (4)                     |
| Bob Hu, MD                                                                                                              | Renee Kaneshiro                                                                          | Palo Alto, CA    | Palo Alto Medical Foundation Research Institute (4) |
| Arthur J. Labovitz, MD<br>Michael Berlowitz, MD<br>Philip Rogal, MD                                                     | Bonnie J. Kirby, RN, MSN<br>Nhi N. Tran, MS                                              | Tampa, FL        | University of South Florida (4)                     |
| Christopher McFarren, MD<br>Fadi Matar, MD<br>Christiano Caldeira, MD<br>David J. Maron, MD                             | Catherine Jahrsdorfer, RN, BSN                                                           |                  |                                                     |
| Fatima Rodriguez, MD, MPH<br>Ingela Schnittger, MD<br>William F. Fearon, MD<br>Prakash Deedwania, MD<br>Kiran Reddy, MD | Reem Yunis, PhD<br>Jhina Patro                                                           | Stanford, CA     | Stanford University School of Medicine (4)          |
|                                                                                                                         | Antonia Vega                                                                             | Fresno, CA       | UCSF - Fresno Community Regional Medical Center (4) |
| Joseph Sweeny, MD                                                                                                       | Hugo Bloise-Adames<br>Santa Jimenez<br>Nicole Saint Vrestil<br>Reyna Bhandari            | New York, NY     | Icahn School of Medicine at Mount Sinai (4)         |
| Christopher Spizzieri, MD                                                                                               | Danielle Schade<br>Roxanne Yost                                                          | Camp Hill, PA    | Holy Spirit Hospital Cardiovascular Institute (4)   |
| Claudia P Hochberg, MD                                                                                                  | Paula Beardsley<br>Denise Fine                                                           | Boston, MA       | Boston Medical Center (4)                           |
| William D. Salerno, MD                                                                                                  | Jana Tancredi, RN, MA/MSN, CCRN<br>Patricia Arakelian<br>Susan Mathus<br>Deborah O'Neill | Saddle Brook, NJ | Hackensack University Medical Center (4)            |
| Ray Wyman, MD                                                                                                           | Joy Burkhardt, CCRP<br>Suellen Hosino, RN, BSN, CCRP                                     | Torrance, CA     | Torrance Memorial Medical Center (4)                |
|                                                                                                                         | Oksana A. Lubyayaya, BA<br>Jose D. Salas, BS                                             | Santa Ana, CA    | Coastal Heart Medical Group (4)                     |

|                                                                                                                               |                                                                                                                                                        |                         |                                                          |
|-------------------------------------------------------------------------------------------------------------------------------|--------------------------------------------------------------------------------------------------------------------------------------------------------|-------------------------|----------------------------------------------------------|
| Amer Zarka, MD<br>Anil V. Shah, MD                                                                                            | Maria Aguirre<br>Manu Dhawan<br>Diana Parra<br>Tri Tran<br>Catherine Weick,<br>BSRT(R)(VI)<br>Katie Fowler-Lehman,<br>BSN<br>Natalie Spitzer, BSN      | Fargo, ND               | Sanford Health (4)                                       |
| Thomas Haldis, DO                                                                                                             | Casey Riedberger<br>Catherine Weick<br>Stanley E. Cobos, BA<br>Raven R. Dwyer, MPH<br>Dalisa Espinosa, MBS<br>Kirsten J. Quiles, MS<br>Carrie Drum, RN | New York, NY            | NYU New York<br>Medical Associates<br>(4)                |
| Jeffrey A. Kohn, MD                                                                                                           | Kimberly Miller-Cox,<br>RN<br>Amy Ollinger, RN<br>Elizabeth Capasso-<br>Gulve<br>Alaine Melanie Loehr<br>Marlowe Mosley                                | Iowa City, IA           | University of Iowa<br>Hospitals and Clinics<br>(4)       |
| Saket Girotra, MD                                                                                                             | Shirin Heydari, MS                                                                                                                                     | Fairview<br>Heights, IL | Advanced Heart Care<br>Group (4)                         |
| Omar Almousalli,<br>MD                                                                                                        | Andrea M. Lundeen,<br>MA<br>Edgar Karanjah, MD                                                                                                         | Orange, CA              | University of<br>California Irvine<br>Medical Center (3) |
| Mayil S. Krishnam,<br>MD<br>Jeffrey C. Milliken,<br>MD<br>Pranav M. Patel,<br>MD<br>Arnold H. Seto, MD<br>Kevin T. Harley, MD | Wanda C. Marfori, MD<br>Eduardo Hernandez-<br>Rangel, MD<br>Pam Singh                                                                                  | Orange, CA              | University of<br>California Irvine<br>Medical Center (3) |
| Michael A. Gibson,<br>MD<br>Byron J. Allen, MD                                                                                | Anne Marie Webb,<br>BSN<br>Ellie Fridell, BS<br>Heidi Wilson, BS<br>Angela Kim, BS                                                                     | Louisville, KY          | University of<br>Louisville (3)                          |
| Rita Coram, MD                                                                                                                | Patrick Wilmot, BS                                                                                                                                     | Rochester, NY           | University of<br>Rochester (3)                           |
| Sabu Thomas, MD,<br>MSc<br>Ronald G Schwartz,<br>MD, MS<br>Wei Chen, MD, MS                                                   | Ramona Stevens                                                                                                                                         | Sarasota, FL            | Cardiovascular<br>Center of Sarasota<br>(3)              |
| Mahfouz El<br>Shahawy, MD                                                                                                     | Loriane Black                                                                                                                                          | Baltimore, MD           | University of<br>Maryland Medical<br>Center (3)          |
| James Stafford, MD                                                                                                            |                                                                                                                                                        |                         |                                                          |

|                                                                                                                             |                                                                                                                                                                                                              |                                            |                                                                                                         |
|-----------------------------------------------------------------------------------------------------------------------------|--------------------------------------------------------------------------------------------------------------------------------------------------------------------------------------------------------------|--------------------------------------------|---------------------------------------------------------------------------------------------------------|
|                                                                                                                             | Amber B. Hull, RN<br>Olivia J. Lim, RN<br>Helen C. Tucker                                                                                                                                                    |                                            |                                                                                                         |
| William B. Abernethy, MD                                                                                                    | Natasha C. Putnam, RN<br>Linda L. Hall<br>Tia Cauthren<br>Trish Tucker                                                                                                                                       | Asheville, NC                              | Asheville Cardiology Associates (3)                                                                     |
| Andrew Zurick, MD                                                                                                           | Hollie Horton<br>Jan Orga                                                                                                                                                                                    | Nashville, TN                              | Saint Thomas Hospital (3)                                                                               |
| Thomas M. Meyer, MD<br>Ronald G. Morford, MD<br>Bruce Rutkin, MD                                                            | Joyce R. White, MSN NP-C<br>Cynthia Baumann, RN                                                                                                                                                              | Lynchburg, VA                              | Stroobants Cardiovascular Center (3)                                                                    |
| Sabahat Bokhari, MD<br>Seth I. Sokol, MD<br>Jay Meisner, MD<br>Ihab Hamzeh, MD<br>Arunima Misra, MD                         | Vidya Seeratan<br>Magnolia Jimenez<br>Cidney Schultz, RN<br>Jeanne Russo, RN                                                                                                                                 | Manhasset, NY<br>New York, NY<br>Bronx, NY | Northwell Health - Manhasset (3)<br>Columbia University Medical Center (3)<br>Jacobi Medical Center (3) |
| Matthew Wall Jr., MD<br>Veronica Lenges De Rosen, MD<br>Mahboob Alam, MD<br>Michael C. Turner, MD<br>Thomas J. Mulhearn, MD | Zohra Huda, RN, BSN, CCRP<br>Araceli Boan<br>Christine R Hinton                                                                                                                                              | Houston, TX<br>Lake Charles, LA            | Baylor College of Medicine (3)<br>Cardiovascular Specialists of Southwest Louisiana (3)                 |
| Arnold P. Good, MD                                                                                                          | Beth A. Archer, BSN, RN<br>Julia S. Dionne, BA<br>Cheryl A. Allardyce, BSN, RN<br>Lindsey N. Sikora, BSN, RN<br>Jennifer H. Czerniak, RN<br>Jennifer A. Mull, MSN, RN<br>Elizabeth Ferguson<br>Frances Laube | Columbus, OH                               | Ohio Health Grant Medical Center (3)                                                                    |
| Nicolas W. Shammass, MD, MS                                                                                                 | Gail A Shammass, BSN, RN<br>Lori Christensen<br>Holly Park                                                                                                                                                   | Davenport, IA                              | Midwest Cardiovascular Research Foundation (3)                                                          |
| Robert Chilton, MD                                                                                                          | Joan Hecht                                                                                                                                                                                                   | San Antonio, TX                            | Audie Murphy V.A. (2)                                                                                   |



|                                        |                                                                                                                      |                  |                                                             |
|----------------------------------------|----------------------------------------------------------------------------------------------------------------------|------------------|-------------------------------------------------------------|
| Patricia K. Nguyen, MD                 | Davis Vo, BS<br>James Hirsch                                                                                         | Palo Alto, CA    | VA Palo Alto Healthcare System (2)                          |
| Matthew Jezior, MD                     | Jody Bindeman<br>Sara Salkind                                                                                        | Bethesda, MD     | Walter Reed National Military Medical Center (2)            |
| Paul C. Gordon, MD<br>Thomas Crain, MD | Dalisa Espinosa, MBS<br>Lori-Ann Desimone, BSN<br>Lina Felix-Stern<br>Jassira Gomes                                  | Providence, RI   | Miriam Hospital (2)                                         |
| Robert Stenberg, MD                    | Catherine Gordon, BSN<br>Aimee Mann<br>Theresa McCreary                                                              | Johnstown, PA    | Conemaugh Valley Memorial Hospital (2)                      |
| Ronald P. Pedalino, MD                 | Stanley E. Cobos, BA<br>Raven R. Dwyer, MPH<br>Dalisa Espinosa, MBS<br>Kirsten J. Quiles, MS<br>Stanley E. Cobos, BA | Brooklyn, NY     | NYU-HHC Kings County Hospital Center (2)                    |
| Joseph Wiesel, MD                      | Raven R. Dwyer, MPH<br>Dalisa Espinosa, MBS<br>Kirsten J. Quiles, MS<br>Candace Gopaul, BS                           | Flushing, NY     | New York University - Langone Cardiovascular Associates (2) |
| George J. Juang, MD                    | Karen Hultberg<br>Tauqir Huk<br>Afshan Hussain<br>Yesenia Zambrano, BS                                               | Brooklyn, NY     | Coney Island Hospital (2)                                   |
| Mohammed Al-Amoodi, MD                 | Sarah Medina Rodriguez<br>Trudie Milner                                                                              | Yuma, AZ         | Yuma Regional Medical Center (2)                            |
| David Wohns, MD                        | Abbey Mulder, RN<br>Stacie Van Oosterhout, MEd                                                                       | Grand Rapids, MI | Spectrum Health (2)                                         |
| Ellis W. Lader, MD                     | Martha Meyer, RN, MSN<br>Nancy L. Clapp, RN, BA, CCRC                                                                | Kingston, NY     | Mid Valley Cardiology (1)                                   |
| Michael Mumma, MD                      | Heather Barrentine<br>Jenne M. Jose, PA                                                                              | Sarasota, FL     | Sarasota Memorial Hospital (1)                              |
| Lekshmi Dharmarajan, MD                | Stanley E. Cobos, BA<br>Raven R. Dwyer, MPH<br>Dalisa Espinosa, MBS<br>Kirsten J. Quiles, MS<br>Jenne Manchery       | Bronx, NY        | NYU-HHC Lincoln Medical and Mental Health Center (1)        |

|                                       |                                           |                   |                                                         |
|---------------------------------------|-------------------------------------------|-------------------|---------------------------------------------------------|
| Joseph F.X. McGarvey Jr, MD           | Vera McKinney, RN<br>Linda Schwarz, RN    | Doylestown, PA    | Doylestown Health Cardiology (1)                        |
| Thomas R. Downes, MD (till Dec. 2016) | Scott M. Kaczowski                        |                   |                                                         |
| Gary J. Luckasen, MD (from Dec. 2016) | Adam J. Jaskowiak                         | Loveland, CO      | Medical Center of the Rockies (1)                       |
|                                       | Joel Klitch                               |                   |                                                         |
| Benjamin Cheong, MD                   | Debra Dees                                | Houston, TX       | Baylor St. Luke's Medical Center (1)                    |
| Srinivasa Potluri, MD                 | Precilia Vasquez                          | Plano, TX         | Baylor Research Institute at Legacy Heart Center (1) ** |
| Ronald A. Mastouri, MD                |                                           |                   |                                                         |
| Jeffery A. Breall, MD, PhD            | Elise L. Hannemann, RN,CCRC               | Indianapolis, IN  | Indiana University/Krannert Institute of Cardiology (1) |
| George E. Revtyak, MD                 | Judy Mae Foltz, RN,CCRC                   |                   |                                                         |
| Jonathan W. Bazeley, MD               | Emily DeRosa                              |                   |                                                         |
| Dayuan Li, MD                         | Beth Jorgenson<br>Joyce Riestenberg-Smith | St. Paul, MN      | HealthEast Saint Joseph's Hospital (1)                  |
| Kenneth Giedd, MD                     |                                           | New York, NY      | Beth Israel Medical Center (1)                          |
| Wayne Old, MD                         | Rebecca Bariciano                         | Chesapeake, VA    | Cardiovascular Associates, Ltd. (1)                     |
| Francis Burt, MD                      |                                           | Bethlehem, PA     | Saint Luke's Hospital and Health Network (1)            |
| Kozhaya Sokhon, MD                    | Jessica Waldron<br>Michelle Mayon         | Sugar land, TX    | Medicus Alliance Clinical Research Org., Inc. (1)       |
| Deepika Gopal, MD                     |                                           | Plano, TX         | The Heart Hospital Baylor (1)                           |
| Uma S. Valeti, MD                     | Gretchen Ann Peichel, RN<br>Brandy Starks | Minneapolis, MN   | University of Minnesota (1)                             |
| Jon Kobashigawa, MD                   | Lucilla Garcia<br>Maria Thottam           | Beverly Hills, CA | Cedars Sinai Medical Center (1)                         |

India (941)  
Country Leader  
Balram Bhargava, DM

|                                              |                       |         |                                  |
|----------------------------------------------|-----------------------|---------|----------------------------------|
|                                              | Anjali Anand, MSc     |         |                                  |
| Sajeev Chakanalil Govindan, MD, DNB, DM, PhD | Janitha Raj, B.Tech   | Calicut | Government Medical College (208) |
| Rajesh Gopalan Nair, MD, DNB, DM             | Reshma Ravindran, MSc |         |                                  |

|                                                                                                                                                            |                                                                                  |           |                                                                               |
|------------------------------------------------------------------------------------------------------------------------------------------------------------|----------------------------------------------------------------------------------|-----------|-------------------------------------------------------------------------------|
| Cholenahally<br>Nanjappa<br>Manjunath, MD, DM                                                                                                              | Rajalekshmi VS, MSc,<br>MScCRRRA<br>Nandita Nataraj,<br>BE(Biotech)<br>PGDICRCMD |           |                                                                               |
| Nagaraja Moorthy,<br>MD, DM                                                                                                                                | Soundarya Nayak,<br>BE(Biotech)<br>PGDICRCMD                                     | Bengaluru | Sri Jayadeva Institute<br>of Cardiovascular<br>Sciences and<br>Research (149) |
| Satvic Cholenahally<br>Manjunath, MD,DM                                                                                                                    | Mahevamma<br>Mylarappa, GNM<br>(General Nursing)                                 |           |                                                                               |
| Suryaprakash<br>Narayanappa,<br>MBBS<br>Neeraj Pandit, MD,<br>DM                                                                                           | Sheromani Bajaj                                                                  |           |                                                                               |
| Ranjit Kumar Nath,<br>MD, DM                                                                                                                               | Vandana Yadav,<br>Msc,PGDACR<br>Girish Mishra, Msc,<br>PGDACR                    | New Delhi | Dr Ram Manohar<br>Lohia Hospital (101)                                        |
| S.K. Dwivedi, DM<br>V.S. Narain, DM<br>Sharad Chandra,<br>DM                                                                                               | Roma Tewari, PG<br>Meenakshi Mishra, PG<br>Shivali Patel                         | Lucknow   | King George's<br>Medical University,<br>Department of<br>Cardiology (100)     |
| Gurpreet S.<br>Wander, DM<br>Rohit Tandon, MD                                                                                                              |                                                                                  |           |                                                                               |
| Sarju Ralhan, M.Ch<br>(CTVS)<br>Naved Aslam, DM                                                                                                            | Baljeet Kaur, MSc<br>(Biotechnology)<br>Sonika Gupta , MBA,<br>B. Pharmacy       | Ludhiana  | Hero DMC Heart<br>Institute, Dayanand<br>Medical College and<br>Hospital (83) |
| Abhishek Goyal,<br>DM<br>Balram Bhargava,<br>DM<br>G.Karthikeyan, DM<br>S.Ramakrishnan,<br>DM<br>Sandeep Seth, DM<br>Rakesh Yadav, DM<br>Sandeep Singh, DM |                                                                                  |           |                                                                               |
| Ambuj Roy, DM<br>Neeraj Parakh, DM<br>Sunil Kumar Verma,<br>DM<br>Rajiv Narang, DM<br>Sundeep Mishra,<br>DM<br>Nitish Naik, DM<br>Gautam Sharma,<br>DM     | Chandini Suvarna,<br>BDS                                                         | New Delhi | All India Institute Of<br>Medical Sciences<br>(67)                            |

|                                                                                                                                        |                                                                                                                                                                                            |             |                                                                                             |
|----------------------------------------------------------------------------------------------------------------------------------------|--------------------------------------------------------------------------------------------------------------------------------------------------------------------------------------------|-------------|---------------------------------------------------------------------------------------------|
| Shiv Kumar<br>Choudhary, M.Ch<br>Chetan Patel, DNB<br>Gurpreet Gulati, MD<br>Sanjeev Sharma,<br>MD<br>V K Bahl, DM<br>Anoop Mathew, MD | Binoy<br>Mannekkattukudy<br>Kurian                                                                                                                                                         | Kolenchery  | MOSC Medical<br>College Hospital (39)                                                       |
| Eapen Punnoose,<br>MD<br>Milind Avdhoot<br>Gadkari, MD<br>Siddharth Gadage,<br>MD DNB<br>Tapan Umesh<br>Pillay, BHMS MSc               | Sheetal Rupesh<br>Karwa, BHMS<br>Suvarna Kolhe, MSc                                                                                                                                        | Pune        | KEM Hospital Pune<br>(35)                                                                   |
| Santhosh Satheesh,<br>MBBS, MD, DM                                                                                                     | R. J. Vindhya, B.Sc.<br>(Bio-Technology),<br>MSc(Bio-Informatics)                                                                                                                          | Pondicherry | Jawaharlal Institute of<br>Postgraduate Medical<br>Education &<br>Research (JIPMER)<br>(31) |
| Atul Mathur, MD<br>Upendra Kaul, MD                                                                                                    | Peeyush Jain, MD<br>Ashok Seth, MD<br>Zile Singh Meharwal,<br>MD<br>Atul Verma, MD<br>Mona Bhatia, MD                                                                                      | New Delhi   | Fortis Escort Heart<br>Institute<br>(31)                                                    |
| Johann Christopher,<br>MD, DNB<br>Rajeev Menon, MD,<br>DNB<br>Nirmal Kumar, MD,<br>DNB<br>Abraham Oomman,<br>MD,DM,DNB                 | Ankush Sachdeva,<br>MD<br>Thounaojam Indira<br>Devi, RN<br>Nungshi Jungla, RN<br>K. Manjula Rani, MSc.                                                                                     | Hyderabad   | Gurunanak CARE<br>Hospital (27)                                                             |
| Robert Mao, MD,<br>DM<br>Hilda Solomon, PhD                                                                                            | M. Sowjanya Reddy,<br>BSc<br>K. Preethi, BSc<br>Rinu R sidh,<br>MSc(Clinical<br>Research)<br>Ramakrishnan T.,<br>B.Tech(Biotechnology<br>)<br>Rajesh Francis,<br>MSc(Clinical<br>Research) | Chennai     | Apollo Research and<br>Innovation (23)                                                      |
| Sudhir Naik, MD,<br>DM<br>Sajeeda Parveen<br>Khan, MBBS,<br>(Dip.Card)                                                                 | Vamshi Priya P., MSc                                                                                                                                                                       | Hyderabad   | Apollo Research &<br>Innovations (13)                                                       |

|                                                                                                                                                                                             |                                                                                          |            |                                                                       |
|---------------------------------------------------------------------------------------------------------------------------------------------------------------------------------------------|------------------------------------------------------------------------------------------|------------|-----------------------------------------------------------------------|
| Johann Christopher, MD<br>Nirmal Kumar, MD                                                                                                                                                  | Kotiboinna Preethi                                                                       | Hyderabad  | CARE Nampally (11)                                                    |
| Purvez Grant, MD                                                                                                                                                                            | Shweta Hande, BHMS, PGDCR<br>Poonam Sonawane, B.ScMicrobiology, ACCR<br>Abhishek Dubey   | Pune       | Ruby Hall Clinic, Grant Medical Foundation (10)                       |
| Ranjan Kachru, MD                                                                                                                                                                           | Kavita Rawat                                                                             | New Delhi  | Fortis Healthcare Fl.t Lt. Rajan Dhall Hospital (4)                   |
| Ajit Kumar VK, MD, DM<br>Sanjay Ganapathi, MD, DM<br>Jayakumar K, MS, M.Ch<br>Harikrishnan<br>Sivadasanpillai, MD, DM<br>Bijulal Sasidharan, MD, DM<br>Kapilamoorthy TR, MD                 | Vineeth CP<br>Manas Chacko, RN<br>Suresh Babu                                            | Trivandrum | Sree Chitra Tirunal Institute for Medical Sciences and Technology (3) |
| Johann Christopher, MD<br>Praneeth Polamuri, MD                                                                                                                                             | Sowjanya Reddy<br>Manjula Rani                                                           | Hyderabad  | CARE Hospital (3)                                                     |
| Upendra Kaul, MD                                                                                                                                                                            | Priyadarshani<br>Arambam<br>Bebek Singh                                                  | New Delhi  | Batra Hospital and Medical Research Centre (BHMRC) (3)                |
| United Kingdom (539)                                                                                                                                                                        |                                                                                          |            |                                                                       |
| Country Leaders                                                                                                                                                                             |                                                                                          |            |                                                                       |
| Roxy Senior, MBBS, MD, DM                                                                                                                                                                   |                                                                                          |            |                                                                       |
| Keith AA Fox, MBChB (past)                                                                                                                                                                  |                                                                                          |            |                                                                       |
| Country Coordinators                                                                                                                                                                        |                                                                                          |            |                                                                       |
| Grace M. Young , MSc, BSc (Hons)                                                                                                                                                            |                                                                                          |            |                                                                       |
| Kathryn Carruthers (past)                                                                                                                                                                   |                                                                                          |            |                                                                       |
| Roxy Senior, MBBS, MD, DM<br>Ahmed Elghamaz, MB BCh<br>Sothinathan Gurunathan, MBChB<br>Nikolaos Karogiannis, MBBS<br>Benoy N Shah, MD, MBBS, BSc (Hons)<br>Richard HJ Trimlett, MBBS, CCST | Grace M. Young , MSc, BSc (Hons)<br>Christopher Kinsey<br>Raisa Kavalakkat, MSc, BSc, RN | Harrow     | Northwick Park Hospital Harrow/ Royal Brompton Hospital London (202)  |

|                                                                                                                                                                                                                                               |                                                                                                                                                     |                                                           |                                                                                                                                                  |
|-----------------------------------------------------------------------------------------------------------------------------------------------------------------------------------------------------------------------------------------------|-----------------------------------------------------------------------------------------------------------------------------------------------------|-----------------------------------------------------------|--------------------------------------------------------------------------------------------------------------------------------------------------|
| Michael B Rubens,<br>LRCP, MRCS,<br>MBBS, DMRD<br>Edward D Nicol,<br>MD, BMedSci,<br>MBBS, DTM&H<br>Tarun K Mittal, MD<br>Reinette Hampson,<br>BSc (Hons), BA<br>(Hons)                                                                       | Jo Evans, RN<br><br>Ikraam Hassan, RN                                                                                                               |                                                           |                                                                                                                                                  |
| Reto Andreas<br>Gamma, MBBS                                                                                                                                                                                                                   | Sarah Williams, RN<br>Kim Holland, RN<br>Karen Swan, RN                                                                                             | Chelmsford                                                | Broomfield Hospital<br>(39)                                                                                                                      |
| Mark A de Belder,<br>MD<br>Jeet Thambyrajah,<br>MD<br>Thuraia Nageh,<br>BSc(Hons) MBBS<br>MD MRCP<br>John R Davies,<br>MBBS, PhD<br>Steven J. Lindsay,<br>MD<br>John Kurian, MD<br>Haqeel Jamil, MD<br>Osama Raheem,<br>MD<br>Angela Hoye, MD | Bev Atkinson, RN<br><br>Swapna Kunhunnu,<br>MRes Clin Res, BSc<br>(N), RN<br><br>Craig Atkinson, RN<br><br>Carita Krannila, RN<br>Manitha Vinod, RN | Middlesbrough<br><br>Westcliffe on<br>Sea<br><br>Bradford | The James Cook<br>University Hospital,<br>Middlesbrough (37)<br><br>Southend University<br>Hospital (34)<br><br>Bradford Royal<br>Infirmary (20) |
|                                                                                                                                                                                                                                               | Lisa Chaytor<br><br>Leanne Cox<br>Julie Morrow<br>Kay Rowe<br>Stephanie Kelly, RN                                                                   | Cottingham                                                | The University of<br>Hull/Castle Hill<br>Hospital (19)                                                                                           |
| Patrick Donnelly,<br>MD<br>Bernardas Valecka,<br>MD                                                                                                                                                                                           | Susan Regan, RN<br><br>Dawn Turnbull<br>Catherine Fleming                                                                                           | Belfast                                                   | South Eastern Health<br>and Social Care (17)                                                                                                     |
| Anoop Chauhan,<br>MD                                                                                                                                                                                                                          | Arijit Ghosh<br>Karen Gratrix<br>Stephen Preston                                                                                                    | Blackpool                                                 | Blackpool Teaching<br>Hospitals (16)                                                                                                             |
| Craig Barr, MD                                                                                                                                                                                                                                | Anne Cartwright                                                                                                                                     | Dudley                                                    | Russells Hall Hospital<br>(15)                                                                                                                   |
| Khaled Alfakih,<br>MBBS, MD<br>Jonathan Byrne,<br>PhD<br>Ian Webb, PhD, MA                                                                                                                                                                    | Abigail Knighton,<br>BSc., PG Dip.<br>Katherine Martin,<br>RGN, Dip. N, MSc                                                                         | London                                                    | King's College NHS<br>Foundation Hospital<br>(14)                                                                                                |

|                                         |                                   |             |                                                          |
|-----------------------------------------|-----------------------------------|-------------|----------------------------------------------------------|
| Peter Henriksen, PhD, MB ChB, BSc(Hons) | Laura Flint, RGN                  | Edinburgh   | Royal Infirmary of Edinburgh (13)                        |
|                                         | James Harrison, BSc(Hons), PG dip |             |                                                          |
| Peter OKane, MD                         | Nicki Lakeman                     | Bournemouth | Royal Bournemouth Hospital (13)                          |
|                                         | Anja Ljubez                       |             |                                                          |
| Ramesh de Silva, MB ChB, MD             |                                   | Bedford     | Bedford Hospital NHS Trust (11)                          |
| Dwayne S. G. Conway, MD                 | Judith Wright                     | Wakefield   | Pinderfields Hospital (11)                               |
|                                         | Donna Exley                       |             |                                                          |
|                                         |                                   |             | University College London Hospitals NHS Foundation Trust |
| Alexander A Sirker, MB BChir, PhD       | Mervyn Andiapen, RN               | London      | BartsHealth NHS Trust                                    |
|                                         | Amy J. Richards, BSc              |             | (11)                                                     |
| Stephen P Hoole, MD                     | Lisa Wong, MSc                    | Cambridge   | Papworth Hospital (10)                                   |
| Fraser N. Witherow, MD                  | Melanie J. Munro, RGN             | Dorchester  | Dorset County Hospital (8)                               |
| Nicola Johnston, MB, Bch BAO, MRCP, MD  |                                   |             |                                                          |
| Mark Harbinson, MB, Bch BAO, MRCP, MD   | Michelle McEvoy, RN               | Belfast     | Belfast Trust (7)                                        |
| Simon Walsh, MB, Bch BAO, MD            | Caroline Brown, RN                |             |                                                          |
| Hanna Douglas, MB, Bch BAO, MRCP, MD    |                                   |             |                                                          |
| Matthew Luckie, MD                      | Thabitha Charles                  | Manchester  | Central Manchester University Hospital (7)               |
|                                         | Laurel Kolakaluri                 |             |                                                          |
|                                         | Hannah Phillips                   |             |                                                          |
|                                         | Louise Morby, RN                  |             |                                                          |
| Jolanta Sobolewska, MD                  | Karen Hallett, RN                 | Oldham      | The Pennine Acute Hospitals NHS Trust (6)                |
|                                         | Carolyn Corbett, RN               |             |                                                          |
|                                         | Lynne Winstanley                  |             |                                                          |
| Paramjit Jeetley, MD                    |                                   |             |                                                          |
| Niket Patel, MD                         | Angelique Smit, RN                | London      | Royal Free London NHS Foundation Trust (6)               |
| Tushar Kotecha, MBChB, Mpharm           |                                   |             |                                                          |
| Christopher Travill, MBBS, MD           | Susan Gent, SRN                   | Luton       | Luton and Dunstable University Hospital NHS FT (5)       |
| Iqbal Karimullah, MBBS                  | RGN                               |             |                                                          |
|                                         | Nafisa Hussain, BSc               |             |                                                          |

|                                 |                                                                                                   |                    |                                                           |
|---------------------------------|---------------------------------------------------------------------------------------------------|--------------------|-----------------------------------------------------------|
| Mahmud Al-Bustami, MBBS         | Fiona Haines                                                                                      | Peterborough       | Peterborough City Hospital (5)                            |
| Denise Braganza, MD             | Joanne Taaffe                                                                                     |                    |                                                           |
| Robert Henderson, MD            | Jane Burton                                                                                       |                    |                                                           |
| Kate Pointon, MBBS              | Maria Colton                                                                                      | Nottingham         | Nottingham University Hospitals (4)                       |
| Surendra Naik, PhD              | Rachel King                                                                                       |                    |                                                           |
| Thomas Mathew, MBBS, MD, DM     |                                                                                                   |                    |                                                           |
|                                 | Ammani Brown, MSc<br>BA RN<br>Andrew Docherty, RN                                                 |                    |                                                           |
| Colin Berry, BSc<br>MB ChB, PhD | Lisa McCloy, RN                                                                                   |                    |                                                           |
| Damien Collison, MB ChB         | Kate Robb, RN                                                                                     | Clydebank          | University of Glasgow (4)                                 |
| Giles Roditi, MB ChB            | Craig Paterson, PhD                                                                               |                    |                                                           |
|                                 | Wenda Crawford, RN<br>Joanne Kelly, RN<br>Lorraine McGregor, RN                                   |                    |                                                           |
| Andrew J Moriarty, BSc MB PhD   | Anne Mackin, RN, BSc                                                                              | Craigavon          | Cardiovascular Research Unit, Craigavon Area Hospital (2) |
| Jason D. Glover, MBBS           |                                                                                                   |                    |                                                           |
| Jiwan Pradhan, MBBS             | Janet P Knight, RN                                                                                | Basingstoke        | Hampshire Hospitals NHS Foundation Trust (2)              |
| Ghada Mikhail, MD               |                                                                                                   |                    |                                                           |
| Darrel P. Francis, MD, MA       | Tuhina Bose                                                                                       | London             | Imperial College Healthcare NHS Trust (1)                 |
| *Canada (447)                   |                                                                                                   |                    |                                                           |
| Country Leaders                 |                                                                                                   |                    |                                                           |
| Vladimir Dzavik, MD             |                                                                                                   |                    |                                                           |
| Shaun Goodman, MD, MSc          |                                                                                                   |                    |                                                           |
| Gilbert Gosselin, MD            | Anna Proietti, RN<br>Myriam Brousseau, RN<br>Magalie Corfias, RN<br>Patricia Blaise<br>Luc Harvey | Montreal, QC       | Montreal Heart Institute (90)                             |
| Ariel Diaz, MD                  |                                                                                                   |                    |                                                           |
| Philippe Rheault, MD            |                                                                                                   | Trois-Rivieres, QC | Centre Hospitalier de Regional Trois-Rivieres (71)        |



|                                             |                                   |                    |                                               |
|---------------------------------------------|-----------------------------------|--------------------|-----------------------------------------------|
| Miguel Barrero, MD                          |                                   |                    |                                               |
| Carl-Éric Gagné,<br>MD                      | Patricia Alarie                   |                    |                                               |
| Yanek Pépin-<br>Dubois, MD                  | Linda Arcand                      |                    |                                               |
| Ricardo Costa, MD                           | Isabelle Roy                      |                    |                                               |
| Ying Tung Sia, MD                           | Estelle Montpetit                 |                    |                                               |
| Catherine Lemay,<br>MD                      |                                   |                    |                                               |
| Alejandro Gisbert,<br>MD                    |                                   |                    |                                               |
| Pierre Gervais, MD                          |                                   |                    |                                               |
| Alain Rheault, MD                           |                                   |                    |                                               |
|                                             | Katia Drouin, RN                  |                    |                                               |
| Denis Carl Phaneuf,<br>MD                   | Christine Bergeron,<br>RN         | Terrebonne,<br>QC  | CISSSL - Hopital<br>Pierre-Le Gardeur<br>(42) |
| Gilbert Gosselin,<br>MD                     | Christine Shelley                 |                    |                                               |
|                                             | Christine Masson                  |                    |                                               |
| Pallav Garg, MBBS,<br>MSc                   | Sandy Carr, RN                    | London, ON         | London Health<br>Sciences Centre (35)         |
|                                             | Catherine Bone, RN                |                    |                                               |
| Benjamin J.W.<br>Chow, MD                   | Ermina Moga                       |                    |                                               |
| Renee C. Hessian,<br>MD                     | Janetta Kourzenkova               | Ottawa, ON         | University of Ottawa<br>Heart Institute (29)  |
| Rob S. Beanlands,<br>MD                     | Olga Walter                       |                    |                                               |
| Richard F. Davies,<br>MD                    |                                   |                    |                                               |
| Kevin R. Baineey,<br>MD, MSc                | Norma Hogg, RN                    | Edmonton, AB       | University of Alberta<br>(28)                 |
| Asim N. Cheema,<br>MD, PhD                  | Suzanne Welsh, RN                 |                    |                                               |
| Akshay Bagai, MD,<br>MHS                    |                                   |                    |                                               |
| Ron Wald, MDCM,<br>MPH                      |                                   |                    |                                               |
| Shaun Goodman,<br>MD, MSc                   | Khrystyna Kushniriuk,<br>HBSc, MD | Toronto, ON        | St. Michael's Hospital<br>(27)                |
| John Joseph<br>Graham, MRCP,<br>MB ChB, BSc | Mohammed Hussain                  |                    |                                               |
| Mark Peterson, MD,<br>FRCSC, PhD            | Olugbenga Bello                   |                    |                                               |
| Chi-Ming Chow,<br>MD, CM, MSc               |                                   |                    |                                               |
| Beth Abramson,<br>MD, MSc                   |                                   |                    |                                               |
| Asim Nazir<br>Cheema, MD                    | Ishba Syed, MBBS                  | Mississauga,<br>ON | Dixie Medical Group<br>(24)                   |
| Mohammad Tariq<br>Vakani, MD                | Mohammed Hussain,<br>BSc(H)       |                    |                                               |

|                           |                                                                                          |                    |                                                                              |
|---------------------------|------------------------------------------------------------------------------------------|--------------------|------------------------------------------------------------------------------|
| James Cha, MD             | Khrystyna Kushniriuk, MBBS<br>Judy Otis, CRC<br>Rebecca Otis, CRC<br>Michelle M Seib, RN | Oshawa, ON         | Dr. James Cha (21)                                                           |
| Andrew G Howarth, MD, PhD | Sandra M Rivest, RN<br>Rosa Sandonato, BSCN                                              | Calgary, AB        | University of Calgary (15)                                                   |
| Graham Wong, MD           | Jackie Chow<br>Andrew Starovoytov<br>Naomi Uchida<br>Ngaire Meadows                      | Vancouver, BC      | Vancouver General Hospital (15)                                              |
| Amar Uxa, MD              | Nadia Asif<br>Suzana Tavares                                                             | Toronto, ON        | University Health Network (14)                                               |
| Paul Galiwango, MD        | Bev Bozek, RN, CCRC                                                                      | Scarborough, ON    | Scarborough Cardiology Research (9)                                          |
| Saleem Kassam, MD         | Maria Shier                                                                              |                    |                                                                              |
| Ashok Mukherjee, MD       | Lori-Ann Larmand                                                                         |                    |                                                                              |
| A. Joseph Ricci, MD       | Amir Janmohamed<br>Brenda Hart                                                           | East Grimsby, ON   | West Lincoln Memorial Hospital (8)                                           |
| Andy Lam, MD              | Jane Marucci<br>Sharon Tai<br>Sonya Brons, RN<br>Chris Beck, RN                          |                    |                                                                              |
| Shamir Mehta, MD          | Glenda Wong, RN<br>Krystal Etherington<br>Thippeekaa<br>Arumairajah<br>Maria Aprile      |                    |                                                                              |
| Jacob Udell, MD           | Sara Karlsson<br>Susan Webber                                                            | Toronto, ON        | Women's College Hospital (7)                                                 |
| Philippe Généreux, MD     | Chantale Mercure                                                                         | Montréal, QC       | Centre Intégré Universitaire de Santé et de Services Sociaux du Montréal (2) |
| Adnan Hameed, MD          | Nancy Aedy                                                                               | St. Catharines, ON | Saint Catharines General Hospital (2)                                        |
| Ledjalem Daba, MD         | Fran Farquharson<br>Anam Siddiqui                                                        | Vaughan, ON        | Northwest GTA Cardiovascular and Heart Rhythm Program (1)                    |

Brazil (399)

Country Leaders

Antonio Carlos Carvalho, MD, PhD

Renato D. Lopes, MD,  
PhD

|                                              |                                      |                |                                                                                                                   |
|----------------------------------------------|--------------------------------------|----------------|-------------------------------------------------------------------------------------------------------------------|
| Whady Hueb, MD                               |                                      |                |                                                                                                                   |
| Paulo Cury<br>Rezende, MD                    | Myrthes Emy Takiuti,<br>RN           | Sao Paulo      | Heart Institute (InCor)<br>University of São<br>Paulo (127)                                                       |
| Expedito Eustáquio<br>Ribeiro Silva, MD      |                                      |                |                                                                                                                   |
| Alexandre Ciappina<br>Hueb, MD               | Leonardo Pizzol<br>Caetano, PhD      | São Paulo      | Instituto Dante<br>Pazzanese de<br>Cardiologia (98)                                                               |
| Paola Emanuela<br>Poggio Smanio,<br>MD, PhD  |                                      |                |                                                                                                                   |
| Alexandre Schaan<br>de Quadros, MD           | Aline Peixoto Deiro                  |                |                                                                                                                   |
| Renato Abdala<br>Karam Kalil, MD             | Alice Manica Muller                  |                |                                                                                                                   |
| José Luiz da Costa<br>Vieira, MD             | Maria Antonieta<br>Pereira de Moraes | Porto Alegre   | Instituto de<br>Cardiologia de Porto<br>Alegre (41)                                                               |
| Gabriel Grossmann<br>, MD                    | Bruna Maria Ascoli                   |                |                                                                                                                   |
| Pedro Píccaro de<br>Oliveira, MD             | Sílvia Zottis Poletti                |                |                                                                                                                   |
| Leonardo Bridi, MD                           |                                      |                |                                                                                                                   |
| Simone Savaris,<br>MD                        |                                      |                |                                                                                                                   |
| João V Vitola, MD,<br>PhD                    |                                      |                |                                                                                                                   |
| Rodrigo J Cerci,<br>MD, Msc                  | Sandra S. Zier, BSc                  |                |                                                                                                                   |
| Fabio R Farias, MD,<br>Msc                   | Vilmar Veiga Jr, BSc                 | Curitiba       | Quanta Diagnostico &<br>Terapia (33)                                                                              |
| Miguel M<br>Fernandes, MD,<br>PhD            |                                      |                |                                                                                                                   |
| José Antonio Marin-<br>Neto, MD, PhD         |                                      |                |                                                                                                                   |
| André Schmidt, MD,<br>PhD                    |                                      |                |                                                                                                                   |
| Moysés de Oliveira<br>Lima Filho, MD,<br>PhD | Diego Franca da<br>Cunha             | Ribeirao Preto | Hospital das Clinicas<br>da Faculdade de<br>Medicina de Ribeirão<br>Preto da<br>Universidade de São<br>Paulo (31) |
| Ricardo Mendes<br>Oliveira, MD               |                                      |                |                                                                                                                   |
| João Reynaldo<br>Abbud Chierice, MD          | Guilherme G Rucatti,<br>PsyD         |                |                                                                                                                   |
| Carísi A. Polanczyk,<br>MD                   | Fernanda Igansi, BSc                 | Porto Alegre   | Hospital de Clínicas<br>de Porto Alegre<br>(12)                                                                   |
| Mariana V. Furtado,<br>MD                    |                                      |                |                                                                                                                   |
| Luis F. Smidt, MD                            | Mauren P Haeffner,<br>BSc            |                |                                                                                                                   |
| Antonio Carlos<br>Carvalho, MD               | Viviane Almeida                      | Sao Paulo      | Unifesp - Hospital<br>Sao Paulo (9)                                                                               |

|                                               |                                                               |                 |                                                                                 |
|-----------------------------------------------|---------------------------------------------------------------|-----------------|---------------------------------------------------------------------------------|
| Gustavo Pucci, MD                             | Gabriela Sanchez de Souza                                     |                 |                                                                                 |
| Flavio Lyra, MD                               |                                                               |                 |                                                                                 |
| Alvaro Rabelo Alves Junior, MD                | Mayana Almeida<br>Viviane dos Santos                          | Salvador        | Fundacao Bahiana de Cardiologia (9)                                             |
| Marianna D. A. Dracoulakis, MD, PhD           | Natalia S Oliveira, RN                                        | Salvador        | Hospital da Bahia (8)                                                           |
| Rodolfo G. S. D Lima, MD                      |                                                               |                 |                                                                                 |
| Estevao Figueiredo, MD                        | Bruna Edilena Paulino Azevedo<br>Marco Bizzaro Santos         | Belo Horizonte  | Hospital Lifecenter (8)                                                         |
|                                               |                                                               |                 |                                                                                 |
| Paulo Ricardo Caramori, MD                    | Amanda Germann<br>Vitor Gomes<br>Rosa Homem<br>Ellen Magedanz | Porto Alegre    | Hospital Sao Lucas da Pontificia Universidade Catolica do Rio Grande do Sol (7) |
|                                               |                                                               |                 |                                                                                 |
| Rogério Tumelero, MD                          | Rosane Laimer<br>Alexandre Tognon                             | Fundo           | Hospital Sao Vicente de Paulo (5)                                               |
| Frederico Dall'Orto, MD                       |                                                               | Pocos de Caldas | Hospital Maternidade e Pronto Socorro Santa Lucia (4)                           |
|                                               |                                                               |                 |                                                                                 |
| Claudio T. Mesquita, MD                       |                                                               |                 |                                                                                 |
| Alexandre S. Colafranceschi, MD               |                                                               |                 |                                                                                 |
|                                               |                                                               |                 |                                                                                 |
| Amarino C. Oliveira Jr., MD                   | Roberta P Santos, RN                                          | Botafogo        | Hospital Pró-Cardíaco (3)                                                       |
| Luiz A. Carvalho, MD                          |                                                               |                 |                                                                                 |
| Isabella C. Palazzo, MD                       |                                                               |                 |                                                                                 |
| Andre S. Sousa, MD                            |                                                               |                 |                                                                                 |
| Exedito Eustáquio Ribeiro da Silva, MD, PhD   |                                                               |                 |                                                                                 |
| Pedro Gabriel Melo de Barros e Silva, MD, PhD | Mariana Yumi Okada, RN                                        |                 |                                                                                 |
| Luciana de Pádua Silva Baptista, MD, PhD      | Ana Paula Batista, RN                                         | Sao Paulo       | Hospital TotalCor (2)                                                           |
| Marcelo Jamus Rodrigues, MD                   | Aline Nogueira Rabaça, BS                                     |                 |                                                                                 |
| Marcos Valério Coimbra de Resende, MD, PhD    |                                                               |                 |                                                                                 |
| Jose Francisco Saraiva, MD                    | Larissa Miranda Trama                                         | Sao Paulo       | Hospital Celso Pierro (1)                                                       |

|                                                                                                                                 |                                                                                                                                                                                                                |                                                                                                      |          |                                                                                  |
|---------------------------------------------------------------------------------------------------------------------------------|----------------------------------------------------------------------------------------------------------------------------------------------------------------------------------------------------------------|------------------------------------------------------------------------------------------------------|----------|----------------------------------------------------------------------------------|
|                                                                                                                                 |                                                                                                                                                                                                                | Talita Silva<br>Camila Thais de Souza Ormundo<br>Carla Vicente<br>Caroline Pinheiro<br>Daniele Komar | Curitiba | Hospital Cardiologico Costantini (1)                                             |
| Poland (333)<br>Country Leaders<br>Witold Ruzylo, MD<br>Hanna Szwed, MD, PhD<br>Country Coordinator<br>Radoslaw Pracon, MD, PhD | Costantino Costantini, MD, PhD                                                                                                                                                                                 |                                                                                                      |          |                                                                                  |
|                                                                                                                                 | Marcin Demkow, MD, PhD<br>Radoslaw Pracon, MD, PhD<br>Cezary Kepka, MD PhD<br>Anna Teresinska, MD PhD<br>Karolina Kryczka, MD PhD<br>Jan Henzel, MD PhD<br>Mateusz Solecki, MD PhD<br>Edyta Kaczmarska, MD PhD | Olga Walesiak<br>Katarzyna Malinowska                                                                | Warsaw   | Coronary and Structural Heart Diseases Department, Institute of Cardiology (127) |
|                                                                                                                                 | Tomasz Mazurek, MD, PhD                                                                                                                                                                                        | Jakub Maksym, MD<br>Karolina Wojtera, MD<br>Anna Fojt, MD<br>Ewa Szczerba, MD                        | Warszawa | Medical University of Warsaw (48)                                                |
|                                                                                                                                 | Jaroslaw Drozd, PhD<br>Bartosz Czarniak, MD<br>Malgorzata Frach (formerly Stasiak), MD<br>Konrad Szymczyk, MD<br>Iwona Niedzwiecka, MD<br>Sebastian Sobczak, MD<br>Tomasz Ciurus, MD<br>Piotr Jakubowski, MD   |                                                                                                      | Lodz     | Cardiology Clinic, Medical University in Lodz (43)                               |

|                                      |                                                  |          |                                                                                                                                     |
|--------------------------------------|--------------------------------------------------|----------|-------------------------------------------------------------------------------------------------------------------------------------|
| Magdalena Misztal-<br>Teodorczyk, MD | Marta Swiderek, MA                               |          |                                                                                                                                     |
| Dawid Teodorczyk,<br>MD              |                                                  |          |                                                                                                                                     |
| Aleksandra<br>Fratczak, MD           | Ewelina Wojtala, MA                              |          |                                                                                                                                     |
| Marcin Szkopiak,<br>MD               |                                                  |          |                                                                                                                                     |
| Patrycja Lebioda,<br>MD              |                                                  |          |                                                                                                                                     |
| Michal Wlodarczyk,<br>MD             |                                                  |          |                                                                                                                                     |
| Anna Plachcinska,<br>MD              |                                                  |          |                                                                                                                                     |
| Jacek Kusmieriek,<br>MD              |                                                  |          |                                                                                                                                     |
| Magdalena Miller,<br>MD              |                                                  |          |                                                                                                                                     |
| Halina Marciniak,<br>MD              |                                                  |          |                                                                                                                                     |
| Karolina Wojtczak-<br>Soska, MD      |                                                  |          |                                                                                                                                     |
| Katarzyna Łuczak,<br>MD              |                                                  |          |                                                                                                                                     |
| Tomasz Tarchalski,<br>MD             |                                                  |          |                                                                                                                                     |
| Anna Cichocka-<br>Radwan, MD         |                                                  |          |                                                                                                                                     |
| Hanna Szwed, MD,<br>PhD              | Jaroslaw Karwowski,<br>MD                        | Warsaw   | National Institute of<br>Cardiology, Warsaw<br>(35)                                                                                 |
| Grazyna Anna<br>Szulczyk, MD         |                                                  |          |                                                                                                                                     |
| Adam Witkowski,<br>MD, PhD           |                                                  |          |                                                                                                                                     |
| Krzysztof Kukuła,<br>MD, PhD         |                                                  | Warsaw   | Department of<br>Interventional<br>Cardiology &<br>Angiology, Institute of<br>Cardiology (20)                                       |
| Małgorzata Celińska-<br>Spodar, MD   |                                                  |          |                                                                                                                                     |
| Joanna Zalewska,<br>MD               |                                                  |          |                                                                                                                                     |
| Grzegorz Gajos,<br>MD, PhD           |                                                  |          |                                                                                                                                     |
| Krzysztof Bury, MD,<br>PhD           |                                                  | Krakow   | Department of<br>Coronary Disease,<br>John Paul II Hospital,<br>Jagiellonian<br>University Medical<br>College (16)                  |
| Piotr Pruszczyk,<br>MD, PhD          | Andrzej Łabyk, MD                                |          | Department of<br>Internal Medicine and<br>Cardiology, Infant<br>Jesus Teaching<br>Hospital, Medical<br>University of Warsaw<br>(15) |
| Marek Roik, MD,<br>PhD               | Agnieszka<br>Szramowska, MD<br>Olga Zdończyk, MD | Warszawa | T.Marciniak Hospital<br>(11)                                                                                                        |
| Krystyna Łoboz-<br>Grudzień, MD, PhD | Joanna Jaroch, MD,<br>PhD                        | Wroclaw  |                                                                                                                                     |

|                                                                  |                                                                                                                                                                                                                                                                                                                                                                                                  |                                                                                                                                                                                     |                                              |                                                                                                                                                                                                                                                                                                                                                                                    |
|------------------------------------------------------------------|--------------------------------------------------------------------------------------------------------------------------------------------------------------------------------------------------------------------------------------------------------------------------------------------------------------------------------------------------------------------------------------------------|-------------------------------------------------------------------------------------------------------------------------------------------------------------------------------------|----------------------------------------------|------------------------------------------------------------------------------------------------------------------------------------------------------------------------------------------------------------------------------------------------------------------------------------------------------------------------------------------------------------------------------------|
|                                                                  | Leszek Sokalski,<br>MD, PhD<br>Barbara Brzezińska,<br>MD, PhD<br>Maciej Lesiak,<br>Professor, MD<br>Magdalena<br>Łanocha, MD<br>Krzysztof W.<br>Reczuch, MD<br>Zbigniew Kalarus,<br>MD<br>Andrzej<br>Swiatkowski, MD<br>Mariola Szulik, MD                                                                                                                                                       | Adam Kolodziej, MD                                                                                                                                                                  | Poznan<br>Wroclaw<br>Zabrze                  | Szpital Kliniczny<br>Przemienienia<br>Pańskiego (10)<br>Military Hospital /<br>Medical University (4)<br>Medical University of<br>Silesia, School of<br>Medicine with the<br>Division of Dentistry,<br>Department of<br>Cardiology,<br>Congenital Heart<br>Diseases and<br>Electrotherapy,<br>Silesian Center for<br>Heart Diseases (3)<br>University Hospital in<br>Bialystok (1) |
| Russia (303)<br>Country Coordinator<br>Olga Bockeria, MD,<br>PhD | Włodzimierz J.<br>Musiał, MD                                                                                                                                                                                                                                                                                                                                                                     | Marta Marcinkiewicz-<br>Siemion, MD                                                                                                                                                 | Bialystok                                    |                                                                                                                                                                                                                                                                                                                                                                                    |
|                                                                  | Leo Bockeria, MD,<br>PhD<br>Karen Petrosyan,<br>MD, PhD<br>Tatiana Trifonova,<br>MD<br>Alexander M.<br>Chernyavskiy, MD,<br>PhD<br>Evgeniy I. Kretov,<br>MD<br>Igor O.<br>Grazhdankin, MD<br>Leonid L. Bershtein,<br>MD, PhD<br>Sergey A.<br>Sayganov, MD,<br>PhD<br>Anastasia M.<br>Kuzmina-<br>Krutetskaya, MD<br>Elizaveta V.<br>Zbyshevskaya, MD,<br>PhD<br>Nana O.<br>Katamadze, MD,<br>PhD | Olga Bockeria, MD,<br>PhD<br>Zalina Kudzoeva, MD<br>Nodira Aripova, MD<br>Ivan A. Naryshkin, MD<br>Alena Kuleshova, MD<br>Dastan Malaev, MD<br>Irina Subbotina<br>Victoria Gumerova | Moscow<br>Novosibirsk<br>Saint<br>Petersburg | National Medical<br>Research Center for<br>Cardiovascular<br>Surgery (113)<br>E. Meshalkin National<br>Medical Research<br>Center of the Ministry<br>of Health of the<br>Russian Federation<br>(101)<br>North-Western State<br>Medical University<br>(50)                                                                                                                          |





|                                                       |                                |                                                                    |                                                                |                                           |
|-------------------------------------------------------|--------------------------------|--------------------------------------------------------------------|----------------------------------------------------------------|-------------------------------------------|
|                                                       | Amparo Martinez Monzonis, MD   | Ana Fernández Martínez, RN                                         | Barcelona                                                      | Hospital de la Santa Creu i Sant Pau (11) |
|                                                       | Alessandro Sionis, MD          |                                                                    |                                                                |                                           |
|                                                       | Montserrat Vila Perales, MD    |                                                                    |                                                                |                                           |
|                                                       | Josep Maria Padró, MD          |                                                                    |                                                                |                                           |
|                                                       | Antonio Serra Peñaranda, MD    |                                                                    |                                                                |                                           |
|                                                       | Joan García Picart, MD         |                                                                    |                                                                |                                           |
|                                                       | Antonino Ginel Iglesias, MD    |                                                                    |                                                                |                                           |
|                                                       | Xavier Garcia-Moll Marimon, MD |                                                                    |                                                                |                                           |
|                                                       | Guillem Pons Lladó, MD         |                                                                    |                                                                |                                           |
|                                                       | Francesc Carreras Costa, MD    |                                                                    |                                                                |                                           |
| Vicente Miro, MD                                      |                                |                                                                    |                                                                |                                           |
| Jose L Diez, MD                                       | Begoña Igual, MD               | Valencia                                                           | Hospital Universitario y Politécnico La Fe (10)                |                                           |
| Pilar Calvillo, MD                                    | M. Quintana Giner, MD          | Murcia                                                             | HUVA, Hospital Clínico Universitario Virgen De La Arrixaca (8) |                                           |
| F. Marin Ortuño, MD, PhD                              |                                |                                                                    |                                                                |                                           |
| M. Valdés Chávarri, MD, PhD                           |                                |                                                                    |                                                                |                                           |
| A. Tello Montolliu, MD, PhD                           |                                |                                                                    |                                                                |                                           |
| E. Pinar Bermudez, MD, PhD                            |                                |                                                                    |                                                                |                                           |
| G. De La Morena, MD, PhD                              | Olga Cañavate                  | Barcelona                                                          | Hospital De Bellvitge (4)                                      |                                           |
| Montserrat Gracida Blancas, MD                        | Sonia Guerrero                 |                                                                    |                                                                |                                           |
|                                                       | Silvia Riera                   |                                                                    |                                                                |                                           |
| Jose Enrique Castillo Luena, MD                       | Jose Enrique Castillo Luena    | Zaragoza                                                           | Hospital Universitario Miguel Servet (4)                       |                                           |
|                                                       | Maria Lasala                   | Madrid                                                             | Hospital General Universitario Gregorio Maranon (2)            |                                           |
| Francisco Fernandez-Aviles, MD                        | Maria Lorenzo                  |                                                                    |                                                                |                                           |
|                                                       | Olga Sobrino                   |                                                                    |                                                                |                                           |
|                                                       | Alexandra Vazquez              |                                                                    |                                                                |                                           |
| China (246)<br>Country Leader<br>Lixin Jiang, MD, PhD | Jiyan Chen, MD                 | Haojian Dong<br>Peiyu He<br>Chunli Xia<br>Junqing Yang<br>Qi Zhong | Guangzhou                                                      | Guangdong General Hospital (102)          |

|                                  |                                                                                                               |           |                                                                        |
|----------------------------------|---------------------------------------------------------------------------------------------------------------|-----------|------------------------------------------------------------------------|
| Yongjian Wu, MD,<br>PhD          | Yanmeng Tian, MD<br><br>Dongze Li                                                                             | Beijing   | Chinese Academy of<br>Medical Sciences,<br>Fuwai Hospital (17)         |
| Yitong Ma, MD<br>Yining Yang, MD | Xiaomei Li<br>Xiang Ma<br>Zixiang Yu<br>Qian Zhao<br>Chunguang Li                                             | Urumqi    | First Affiliated<br>Hospital of Xinjiang<br>Medical University<br>(15) |
| Zheng Ji, MD                     | Lei Zhang<br>Yu Zhao<br>Bolin Zhu<br>Mulei Chen                                                               | Tangshan  | Tangshan Gongren<br>Hospital (15)                                      |
| Xinchun Yang, MD                 | Hongjie Chi<br>Yang Wang<br>Jing Zhang                                                                        | Beijing   | Beijing Chao-yang<br>Hospital, Capital<br>Medical University<br>(12)   |
| Wenhua Lin, MD                   | Rui Jing<br>Jingjing Liu<br>Qiang Zhou, MD<br>Chang Xu, MD                                                    | Tianjing  | TEDA International<br>Cardiovascular<br>Hospital (12)                  |
| Hesong Zeng, MD                  | Zhuxi Li, MD<br>Junhua Li, MD<br>Luyang Xiong, MD<br>Dan Gao                                                  | Wuhan     | Tongji Medical<br>College (11)                                         |
| Xin Fu, MD                       | Dengke Jiang<br>Ran Leng<br>Xutong Wang<br>Qianqian Yuan<br>Lili Zhang<br>Ziliang Bai<br>Jianhua Li<br>Jie Qi | Zhengzhou | The First Affiliated<br>Hospital of<br>Zhengzhou University<br>(11)    |
| Bin Yang, MD                     | Fei Wang<br>Haitao Wang<br>Bin Yang<br>Zhou Yue<br>Zhulin Zhang<br>Yumei Dong                                 | Taiyuan   | Shanxi<br>Cardiovascular<br>Hospital (10)                              |
| Songtao Wang, MD                 | Jiajia Mao<br>Bin Zhang                                                                                       | Qingdao   | Qingdao Fuwai<br>Hospital (8)                                          |
| Gong Cheng, MD                   | Xiuhong Li<br>Xiaowei Yao                                                                                     | Xian      | Shanxi Provincial<br>People's Hospital (6)                             |

|                                          |                                                          |           |          |                                                                                        |
|------------------------------------------|----------------------------------------------------------|-----------|----------|----------------------------------------------------------------------------------------|
|                                          | Nier Zhong<br>Ning Zhou<br>Yaping Huang, MS              |           |          |                                                                                        |
| Yulan Zhao, MD                           | Panpan Zhou, MS                                          | Zhengzhou |          | The Second Affiliated Hospital of Zhengzhou University (6)                             |
| Xuehua Fang, MD                          | Wei Su                                                   | Beijing   |          | Liangxiang Hospital, Beijing Fangshan District (6)                                     |
|                                          | Yu Kunwu<br>Yudong Peng<br>Xin Su                        |           | Wuhan    | Wuhan Union Hospital, Tongji Medical College, Huazhong Science and Tech University (3) |
| Qiutang Zeng, MD                         |                                                          |           |          |                                                                                        |
| Xi Su, MD                                | Chen Wang<br>Yunhai Zhao                                 |           | Wuhan    | Wuhan Asia Heart Hospital (3)                                                          |
|                                          | Yaming Geng<br>Yanfu Wang                                |           | Jining   | Affiliated Hospital of Jining Medical University (3)                                   |
|                                          | Jing-yao Fan, MD<br>Si-ting Feng, MD,PhD                 |           |          |                                                                                        |
| Shao-ping Nie, MD, PhD                   | Xiao Wang, MD,PhD<br>Yan Yan, MD,PhD                     | Beijing   |          | Beijing Anzhen Hospital (2)                                                            |
|                                          | Hui-min Zhang, MD,PhD<br>Lingping Chi                    |           | Dalian   | Affiliated Zhongshan Hospital of Dalian University (2)                                 |
| Qin Yu, MD                               | Fang Liu<br>Han Chen                                     |           |          |                                                                                        |
|                                          | Jun Jiang<br>Huajun Li<br>Jian'an Wang<br>Yechen Han, MM |           | Hangzhou | The Second Affiliated Hospital Zhejiang University School of Medicine (1)              |
| Jian'an Wang, MD                         |                                                          |           |          |                                                                                        |
|                                          | Lihong Xu, RN<br>Zhenyu Liu                              |           | Beijing  | Peking Union Medical College Hospital (1)                                              |
| Shuyang Zhang, MD, PhD<br>Zhenyu Liu, MD | Gang Chen<br>Rongrong Hu                                 |           |          |                                                                                        |

\*Italy (139)  
Country Leader  
Aldo P. Maggioni, MD

|                                                                    |                          |        |  |                                                   |
|--------------------------------------------------------------------|--------------------------|--------|--|---------------------------------------------------|
| Gian Piero Perna, MD<br>Marco Marini, MD<br>Gabriele Gabrielli, MD | Francesca Pietrucci, PhD | Ancona |  | Cardiology and CCU - Ospedali Riuniti Ancona (54) |
|--------------------------------------------------------------------|--------------------------|--------|--|---------------------------------------------------|

|                                                                         |                                                                   |                      |                                                                                                               |
|-------------------------------------------------------------------------|-------------------------------------------------------------------|----------------------|---------------------------------------------------------------------------------------------------------------|
| Stefano Provasoli, MD<br>Edoardo Verna, MD                              | Anna Di Donato                                                    | Varese               | Ospedale di Circolo e Fondazione Macchi (23)                                                                  |
| Lorenzo Monti, MD<br>Barbara Nardi, MD                                  |                                                                   | Rozzano              | Humanitas Research Hospital, Rozzano (MI) (17)                                                                |
| Antonio Di Chiara, MD                                                   | Francesca Pezzetta, MD                                            | Tolmezzo             | Azienda Servizi Sanitaria n.3 Alto Friuli-Collinare-Medio Friuli (9)                                          |
| Andrea Mortara, MD<br>Marcello Galvani, MD<br>Filippo Ottani, MD        | Valentina Casali, MD<br>Chiara Attanasio                          | Monza<br>Forli       | Policlinico di Monza, Monza MB (8)<br>Ospedale "G.B. Morgagni – L. Pierantoni" Forli (AUSL della Romagna) (8) |
| Marco Sicuro, MD                                                        | Gianpiero Leone, MD<br>Francesco Pisano, MD<br>Cristina Bare, BSc | Aosta                | Ospedale Regionale Umberto Parini (5)                                                                         |
| Paolo Calabro, MD<br>Tiziana Formisano, MD                              | Fabio Fimiani                                                     | Napoli               | AORN Dei Colli "V. Monaldi" UOC Cardiologia Università della Campania "L. Vanvitelli" (4)                     |
| Giuseppe Tarantini, MD<br>Umberto Cucchini, MD<br>Anto Luigi Andres, MD | Alberto Barioli, MD<br>Federica Ramani                            | Padua                | University of Padua-Cardiology Clinic (3)                                                                     |
| Emanuela Racca, MD<br>Carlo Briguori, MD                                | Fabrizio Rolfo, MD<br>Cecilia Goletto                             | Cuneo<br>Naples      | Azienda Ospedaliera S. Croce e Carle (3)<br>Clinica Mediterranea (2)                                          |
| Roberto Amati, MD<br>William Vergoni, MD<br>Aldo Russo, MD              | Stefano Di Marco, MD<br>Martina Tricoli                           | Pescia               | UO Cardiologia Ospedale SS Cosma e Damiano (2)                                                                |
| Raffaele Fanelli, MD                                                    | Massimo Villella, MD                                              | San Giovanni Rotondo | IRCCS "Casa Sollievo della Sofferenza" (1)                                                                    |

\*Singapore (61)

Country Leader

Harvey Douglas White, MD

Country Coordinator

Caroline Alswailer

Kian-Keong Poh,  
MD  
Ping Chai, MD  
  
Titus Lau, MD  
  
Joshua P. Loh, MD  
  
Edgar L. Tay, MD  
  
Kristine Teoh, MD  
  
Lynette L. Teo, MD  
  
Ching-Ching Ong,  
MD  
Raymond C. Wong,  
MD  
Poay-Huan Loh,  
MD  
Theodoros Kofidis,  
MD  
Wan Xian Chan,  
MD  
Koo Hui Chan, MD  
  
David Foo, MBBS

Sik-Yin V Tan, BSc  
  
Winnie C Sia, BSc  
  
Audrey W Leong, BSc

Singapore

National University  
Heart Center  
Singapore (33)

Jason Loh Kwok  
Kong, MD  
Ching Min Er, MD

Li Hai Yan, RN

Singapore

Tan Tock Seng  
Hospital (22)

Fahim Haider  
Jafary, MD

Nasrul Ismail

Terrance Chua, MD

Min Tun Kyaw  
Deborah Yip

Singapore

National Heart Centre  
Singapore (6)

Germany (54)

Country Leader

Rolf Doerr, MD

Rolf Doerr, MD  
  
Juergen Stumpf,  
MD  
Klaus Matschke,  
MD, PhD  
Gregor Simonis,  
MD, PhD  
Clemens T. Kadalie,  
MD  
Udo Sechtem, MD

Dorit Grahl  
  
Franziska Guenther  
  
Kerstin Bonin  
  
Ina Wenzelburger

Dresden

Praxisklinik Herz und  
Gefaesse (29)

Stuttgart

|                             |                                                    |                                                                    |          |                                                            |
|-----------------------------|----------------------------------------------------|--------------------------------------------------------------------|----------|------------------------------------------------------------|
|                             | Peter Ong, MD                                      | Susanne Gruensfelder, RN                                           |          | Robert-Bosch-Krankenhaus (22)                              |
|                             | P. Christian Schulze, MD, PhD<br>Bjoern Goebel, MD |                                                                    | Jena     | University Hospital Jena (2)                               |
|                             | Karsten Lenk, MD                                   |                                                                    |          |                                                            |
|                             | Georg Nickenig, MD                                 | Jan-Malte Sinning, MD<br>Marcel Weber, MD<br>Nikos Werner, MD      | Bonn     | Universitätsklinikum Bonn (1)                              |
| Austria (50)                |                                                    |                                                                    |          |                                                            |
| Country Leaders             |                                                    |                                                                    |          |                                                            |
| Irene Marthe Lang, MD       |                                                    |                                                                    |          |                                                            |
| Kurt Huber, MD              |                                                    |                                                                    |          |                                                            |
|                             | Herwig Schuchlenz, MD<br>Stefan Weikl, MD          | Gudrun Steinmaurer                                                 | Graz     | LKH Graz West Austria (35)                                 |
|                             | Irene Marthe Lang, MD                              | Max-Paul Winter, MD                                                | Vienna   | Medical University of Vienna, Department of Cardiology (8) |
|                             |                                                    | Tijana, Andric, MD                                                 |          |                                                            |
|                             | Kurt Huber, MD                                     | Maximilian, Tscharre, MD                                           |          |                                                            |
|                             | Gabriele, Jakl-Kotauschek, MD                      | Claudia, Wegmayr, MSc<br>Bernhard, Jäger, MD<br>Florian, Egger, MD | Vienna   | Wilhelminen Hospital Vienna (7)                            |
| Hungary (49)                |                                                    |                                                                    |          |                                                            |
| Country Leader              |                                                    |                                                                    |          |                                                            |
| Matyas Keltai, MD, PhD, DSc |                                                    |                                                                    |          |                                                            |
|                             |                                                    | Judit Sebo, MD                                                     |          |                                                            |
|                             | Andras Vertes, MD                                  | Zoltan Davidovits, MD<br>Laszlone Matics                           | Budapest | Eszszk- Szent Istvan Hospital (20)                         |
|                             | Albert Varga, MD, PhD<br>Geza Fontos, MD           | Gergely Ágoston, MD                                                | Szeged   | University of Szeged (12)                                  |
|                             |                                                    | Gabor Dekany, MD                                                   | Budapest | George Gottsegen National Institute of Cardiology (9)      |
|                             | Bela Merkely, MD, PhD, DSc                         | Andrea Bartykowszki, MD<br>Pal Maurovich-Horvat, MD, PhD, MPH      | Budapest | Heart and Vascular Center, Semmelweis University (8)       |

|             |                                                                                                                                                                                                                                  |                                                                                                                                                              |                              |                                                                                                                                                |                                              |
|-------------|----------------------------------------------------------------------------------------------------------------------------------------------------------------------------------------------------------------------------------|--------------------------------------------------------------------------------------------------------------------------------------------------------------|------------------------------|------------------------------------------------------------------------------------------------------------------------------------------------|----------------------------------------------|
| Serbia (47) | Gabor Kerecsen,<br>MD                                                                                                                                                                                                            | Agnes Jakal                                                                                                                                                  | Budapest                     | Military Hospital,<br>Budapest (1)                                                                                                             |                                              |
|             | Sasa Hinic, MD,<br>BSc<br>Marija Zdravkovic,<br>MD, PhD<br>Vladan Mudrenovic,<br>MD<br>Bogdan Crnokrak,<br>MD<br>Branko D. Beleslin,<br>MD, PhD<br>Nikola N. Boskovic,<br>MD<br>Marija T. Petrovic,<br>MD<br>Milan R. Dobric, MD | Jelena Djokic, MD                                                                                                                                            | Belgrade                     | University Hospital<br>Center Bezanijaska<br>Kosa (13)                                                                                         |                                              |
|             | Zeljko Z. Markovic,<br>MD, PhD<br>Ana S. Mladenovic,<br>MD, PhD                                                                                                                                                                  | Ana D. Djordjevic-<br>Dikic, MD, PhD<br>Vojislav L. Giga, MD,<br>PhD<br>Jelena J. Stepanovic,<br>MD, PhD                                                     | Belgrade                     | Faculty of Medicine,<br>University of<br>Belgrade; Cardiology<br>Clinic, Clinical Center<br>of Serbia (10)                                     |                                              |
|             | Nada Cemerlic-<br>Adjic, MD                                                                                                                                                                                                      | Lazar Velicki, MD<br>Ljiljana Pupic                                                                                                                          | Sremska<br>Kamenica          | Institute of<br>Cardiovascular<br>Diseases Vojvodina,<br>Sremska Kamenica,<br>Serbia and Faculty of<br>Medicine, University<br>of Novi Sad (9) |                                              |
|             | Goran Davidović,<br>MD, PhD<br>Rada Vučić, MD                                                                                                                                                                                    | Stefan M. Simović,<br>MD                                                                                                                                     | Kragujevac                   | Clinical Center<br>Kragujevac (7)                                                                                                              |                                              |
|             | Milica Nikola<br>Dekleva, MD PhD                                                                                                                                                                                                 | Miroslav Stevo<br>Martinovic, MD<br>Gordana Stevanovic                                                                                                       | Belgrade                     | University Clinical<br>Hospital Zvezdara (6)                                                                                                   |                                              |
|             | Goran Stankovic,<br>MD                                                                                                                                                                                                           | Milan Dobric                                                                                                                                                 | Belgrade                     | Clinical Center of<br>Serbia (1)<br>Clinic for<br>Cardiovascular<br>Diseases, Clinical<br>Center Nis (1)                                       |                                              |
|             | Svetlana<br>Apostolovic, MD                                                                                                                                                                                                      | Sonja Salinger<br>Martinovic<br>Dragana Stanojevic                                                                                                           | Nis                          |                                                                                                                                                |                                              |
|             | Mexico (46)                                                                                                                                                                                                                      | Jorge Escobedo,<br>MD<br>Rubén Baleón-<br>Espinosa, MD<br>Arturo S Campos-<br>Santaolalla, MD<br>Elihú Durán-Cortés,<br>MD<br>José M Flores-<br>Palacios, MD | Ramon de Jesús-<br>Pérez, RN | Benito Juarez                                                                                                                                  | Instituto Mexicano del<br>Seguro Social (35) |

Andrés García-Rincón, MD  
 Moisés Jiménez-Santos, MD  
 Joaquín V Peñafiel, MD  
 José A Ortega-Ramírez, MD  
 Aquiles Valdespino-Estrada, MD

María Fernanda Canales Brassetti, MD  
 Diego Adrián Vences Anaya, MD  
 María Pérez García

Erick Alexánderson Rosas, MD

Isabel Estela Carvajal Juárez, MD  
 Magdalena Madero Rovalo, MC  
 Erick Donato Morales Rodríguez, MD

Mexico City

Instituto Nacional de Cardiología "Ignacio Chávez" (11)

Australia (45)

Country Leaders

Joseph B. Selvanayagam, MBBS (Hons), DPhil

Jamie Rankin, MBBS (*past*)

Country Coordinator

Deirdre Murphy

Joseph B. Selvanayagam, MBBS (Hons), DPhil  
 Majo X. Joseph, MBBS

Sau Lee, PhD

Prince Thomas, RN

Melissa D Chaplin, RN

Adelaide

Flinders Medical Centre (30)

Suku T. Thambar, MBBS

Stephanie C Boer, B Biotechnology (Honours)  
 Jeanette K. Stansborough, RN

New Lambton Heights

John Hunter Hospital (8)

John F. Beltrame, MD

Marilyn Black, RN

Woodville South

The Queen Elizabeth Hospital (5)

Graham S. Hillis, PhD

Michelle M. Bonner, B. Nursing  
 Kim F. Ireland, RN  
 Clare Venn-Edmonds, RN

Perth

Royal Perth Hospital (2)

France (42)

Country Leader



Philippe-Gabriel Steg, MD

Country Coordinators

Helene Abergel

Jean-Michel Juliard

|                                                                             |                                                                             |                           |                                                            |
|-----------------------------------------------------------------------------|-----------------------------------------------------------------------------|---------------------------|------------------------------------------------------------|
|                                                                             | Corine Thobois, RN                                                          |                           |                                                            |
| Christophe Thuaire, MD<br>Téodora Dutoiu, MD                                | Emilie Tachot, RN<br>Christophe Laure, RN                                   | Chartres                  | C.H. Louis Pasteur (21)                                    |
| Philippe Gabriel Steg, MD<br>Jean-Michel Juliard, MD<br>Michel S. Slama, MD | Christel Vassaliere, RN<br>Helene Abergel, MSc<br>Axelle Fuentes, MSc       | Paris                     | Bichat Hospital (9)                                        |
| Rami El Mahmoud, MD                                                         | Ludivine Eliahou, MD<br>Olivier Dubourg, MD<br>Pierre Michaud, MD           | Clamart Cedex<br>Boulogne | Antoine-Beclere Hospital (5)<br>Ambroise Pare Hospital (2) |
| Eric Nicollet, MD<br>Pascal Goube, MD                                       | Sarah Hadjih<br>Patricia Brito                                              | Corbeil-Essonnes Cedex    | Centre Hospitalier Sud Francilien (2)                      |
| Gilles Barone-Rochette, MD<br>Alain Furber, MD                              | Gilles Barone-Rochette<br>Charles Cornet, MD, PhD                           | Grenoble                  | Grenoble University Hospital (2)                           |
| Loïc Bière, MD                                                              | Jeremy Rautureau, MD, PhD                                                   | Angers Cedex 9            | Centre Hospitalier Universitaire d'Angers (1)              |
| Lithuania (39)                                                              | Agne Juceviciene, MD<br>Irma Kalibataite-Rutkauskiene, MD<br>Laura Keinaite |                           |                                                            |
| Aleksandras Laucevicius, MD<br>Jelena Celutkiene, MD                        | Monika Laukyte<br>Gelmina Mikolaitiene                                      | Vilnius                   | Vilnius University Hospital Santariskes Clinic (39)        |
|                                                                             | Akvile Smigelskaite, MD<br>Ilona Tamasauskiene, MD<br>Agne Urboniene, MD    |                           |                                                            |
| *Netherlands (37)                                                           | Elvin Kedhi MD, PhD<br>Jorik Timmer, MD                                     | Zwolle                    | Isala Klinieken (25)                                       |



|                                 |                                                                                          |                                                           |                                 |                                                         |
|---------------------------------|------------------------------------------------------------------------------------------|-----------------------------------------------------------|---------------------------------|---------------------------------------------------------|
|                                 | Pedro Canas Silva, MD<br>Angelo Nobre, MD                                                | Marta Capinha<br>Maria Inês Caetano                       |                                 |                                                         |
|                                 | Ana Rita Francisco, MD<br>Nuno Ferreira, MD                                              | Susana Silva                                              |                                 |                                                         |
|                                 | Ricardo L. Lopes, MD                                                                     |                                                           | Vila Nova de Gaia               | Centro Hospitalar de Vila Nova de Gaia/Espinho, EPE (2) |
| Argentina (29)                  |                                                                                          |                                                           |                                 |                                                         |
| Country Leader                  |                                                                                          |                                                           |                                 |                                                         |
| Rafael Diaz, MD ( <i>past</i> ) |                                                                                          |                                                           |                                 |                                                         |
|                                 | Luis Guzman, MD                                                                          | Veronica Tinnirello                                       | Cordoba                         | Instituto Medico DAMIC (11)                             |
|                                 | Julio César Figal, MD<br>Oscar Méndiz, MD<br>Claudia Cortés, MD                          | Matías Nicolás Mungo                                      | Ciudad Autónoma de Buenos Aires | Fundación Favaloro (10)                                 |
|                                 | Roberto René Favaloro, MD<br>Carlos Alvarez, MD                                          | Marina Garcia                                             | Bahia Blanca                    | Hospital Italiano Regional del Sur Bahia Blanca (3)     |
|                                 | Javier Courtis, MD                                                                       |                                                           |                                 | Clinica Romagosa and Clinica De La Familia (2)          |
|                                 | Gabriela Zeballos, MD<br>Lilia Schiavi, MD                                               | Valeria Godoy<br>Maria Victoria Actis                     | Cordoba<br>Cordoba              | Clinica Del Prado (2)                                   |
|                                 | Mariano Rubio, MD                                                                        | Graciela Scaro, MD                                        | Cordoba                         | Clínica Privada Vélez Sarsfield (1)                     |
| *New Zealand (28)               |                                                                                          |                                                           |                                 |                                                         |
| Country Leader                  |                                                                                          |                                                           |                                 |                                                         |
| Harvey Douglas White, MD        |                                                                                          |                                                           |                                 |                                                         |
| Country Coordinator             |                                                                                          |                                                           |                                 |                                                         |
| Caroline Alswailer              |                                                                                          |                                                           |                                 |                                                         |
|                                 | Gerard Patrick Devlin, MD<br>Raewyn Fisher, MD                                           | Liz Low, RN<br>Jayne Scales, RN<br>Kirsty Abercrombie, RN | Hamilton                        | Waikato Hospital (22)                                   |
|                                 | Ralph Alan Huston Stewart, MCChB, MD<br>Harvey Douglas White, MD<br>Jocelyne Benatar, MD | Leah Howell, RN<br>Cathrine Patten, RN                    | Auckland                        | Auckland City Hospital (6)                              |

\*Macedonia (28)

Sasko Kedev, MD,  
PhD  
Irena Peovska Mitevaska, MD, PhD  
Elizabeta Srbinovska Kostovska, MD, PhD  
Hristo Pejkov, MD,  
PhD

Skopje

University Clinic of  
Cardiology (28)

\*Sweden (23)

Country Leader

Claes Held, MD, PhD

Claes Held, MD,  
PhD  
Kai Eggers, MD,  
PHhD  
Gunnar Frostfelt,  
MD, PhD  
Nina Johnston, MD,  
PhD  
Maciej Olsowka,  
MD  
Axel Åkerblom, MD,  
PhD  
Inga Soveri, MD,  
PhD  
Johannes Aspberg,  
MD  
Christina Björklund,  
RN  
Maria Andreasson,  
RN  
Marie Essermark, RN  
Liselotte Persson

Uppsala

Uppsala University  
(18)

Stockholm

Karolinska Institutet  
at Danderyd Hospital  
(5)

Israel (15)

Country Leaders

Rafael Beyar, MD, MD, DSc, MPH

Tali Sharir, MD

Country Coordinator

Eugenia Nikolsky, MD

Tali Sharir, MD  
Dan Elian, MD  
Arthur Kerner, MD  
Samia Massalha,  
MD  
Or Harel, MA  
Margalit Bentzvi  
Ludmila Helmer

Tel-Aviv

Assuta Medical  
Centers (9)

Haifa

Rambam Medical  
Center (6)

Japan (14)

Country Leader

Shun Kohsaka, MD

Keiichi Fukuda, MD,  
PhD  
Ikuko Ueda, PhD

Shinjuku-ku

Keio University (7)

|                            |                            |                          |             |                                                 |
|----------------------------|----------------------------|--------------------------|-------------|-------------------------------------------------|
|                            | Shun Kohsaka, MD           | Jun Fujita, MD           |             |                                                 |
|                            |                            | Akemi Furukawa, RN       |             |                                                 |
|                            | Satoshi Yasuda, MD, PhD    | Kanae Hirase, RN         | Suita-shi   | National Cerebral and Cardiovascular Center (4) |
|                            |                            | Toshiyuki Nagai, MD, PhD |             |                                                 |
|                            |                            | Fumiyuki Otsuka, MD, PhD |             |                                                 |
|                            | Shigeyuki Nishimura, MD    | Shintaro Nakano          | Hidaka      | Saitama Medical University (3)                  |
| *Belgium (7)               |                            |                          |             |                                                 |
| Country Leader             |                            |                          |             |                                                 |
| Frans Van de Werf, MD, PhD |                            |                          |             |                                                 |
| Country Coordinator        |                            |                          |             |                                                 |
| Kaatje Goetschalckx, MD    |                            |                          |             |                                                 |
|                            | Kaatje Goetschalckx, MD    |                          |             |                                                 |
|                            | Frans Van de Werf, PhD, MD | Valerie Robesyn          | Leuven      | University Hospital Leuven (7)                  |
|                            | Kathleen Claes, PhD, MD    |                          |             |                                                 |
| *Taiwan (7)                |                            |                          |             |                                                 |
| Country Leader             |                            |                          |             |                                                 |
| Harvey Douglas White, MD   |                            |                          |             |                                                 |
| Country Coordinator        |                            |                          |             |                                                 |
| Caroline Alswailer         |                            |                          |             |                                                 |
|                            | Chung-Lieh Hung, MD        |                          |             |                                                 |
|                            | Chun-Ho Yun, MD            |                          |             |                                                 |
|                            | Charles Jia-Yin Hou, MD    |                          |             |                                                 |
|                            | Jen-Yuan Kuo, MD           |                          |             |                                                 |
|                            | Hung-I Yeh, MD, PhD        |                          |             |                                                 |
|                            | Ta-Chuan Hung, MD          | Yi-Hsuan Yang            | Taipei City | Mackay Memorial Hospital (7)                    |
|                            | Jiun-Yi Li, MD, PhD        |                          |             |                                                 |
|                            | Chen-Yen Chien, MD, PhD    |                          |             |                                                 |
|                            | Cheng-Ting Tsai, MD        |                          |             |                                                 |
|                            | Chun-Chieh Liu, MD         |                          |             |                                                 |
|                            | Fa-Chang Yu, MD            |                          |             |                                                 |

|                      |                               |                                           |           |                                                                                       |
|----------------------|-------------------------------|-------------------------------------------|-----------|---------------------------------------------------------------------------------------|
|                      | Yueh-Hung Lin, MD             |                                           |           |                                                                                       |
|                      | Wei-Ren Lan, MD               |                                           |           |                                                                                       |
|                      | Chih-Hsuan Yen,<br>MD         |                                           |           |                                                                                       |
|                      | Jui-Peng Tsai, MD             |                                           |           |                                                                                       |
|                      | Kuo-Tzu Sung, MD              |                                           |           |                                                                                       |
| *South Africa (7)    |                               |                                           |           |                                                                                       |
|                      | Mpiko Ntsekhe, MD             |                                           |           |                                                                                       |
|                      | Shaheen Pandie,<br>MD         | Constance Philander<br>(Nee Talliard), ND | Cape Town | Groote Schuur<br>Hospital / University<br>of Cape Town (7)                            |
|                      | Charle A Viljoen,<br>MD       | Noloyiso Mtana, RN                        |           |                                                                                       |
|                      | Marianne De<br>Andrade, MD    |                                           |           |                                                                                       |
| *Switzerland (7)     |                               |                                           |           |                                                                                       |
| Country Leader       |                               |                                           |           |                                                                                       |
| Aldo P. Maggioni, MD |                               |                                           |           |                                                                                       |
|                      | Tiziano Moccetti,<br>MD       | Adriana Anesini, RN                       |           | Cardiocentro (7)                                                                      |
|                      | M.Grazia Rossi, MD            | Simona Maspoli, RN                        | Lugano    |                                                                                       |
|                      |                               | Manuela Mombelli, RN                      |           |                                                                                       |
| Egypt (6)            |                               |                                           |           |                                                                                       |
|                      | Magdy Abdelhamid,<br>MD       |                                           |           |                                                                                       |
|                      | Ahmed Adel, MD                |                                           |           |                                                                                       |
|                      | Ahmed Kamal, MSc              |                                           |           |                                                                                       |
|                      | Hossam Mahrous,<br>MD         | Ahmed Talaat, MD                          | Cairo     | Cairo University (6)                                                                  |
|                      | Sameh El Kaffas,<br>MD        |                                           |           |                                                                                       |
|                      | Hussien El Fishawy,<br>MD     |                                           |           |                                                                                       |
| Romania (5)          |                               |                                           |           |                                                                                       |
|                      | Calin Pop, MD, PhD            |                                           |           |                                                                                       |
|                      | Matei Claudia, MD,<br>PhD     |                                           | Bucharest | Emergency County<br>Hospital Baia Mare<br>(4)                                         |
|                      | Bogdan A.<br>Popescu, MD, PhD |                                           |           |                                                                                       |
|                      | Carmen Ginghina,<br>MD, PhD   | Monica Rosca, MD,<br>PhD                  | Bucharest | Emergency Institute<br>of Cardiovascular<br>Diseases "Prof. Dr.<br>C. C. Iliescu" (1) |
|                      | Dan Deleanu, MD,<br>PhD       | Carmen C. Beladan,<br>MD, PhD             |           |                                                                                       |
|                      | Vlad A. Iliescu, MD,<br>PhD   |                                           |           |                                                                                       |

\*Saudi Arabia (5)

Mouaz H. Al-Mallah,  
MD MSc  
Ahmed Aljzeeri,  
MD  
Hani Najm, MD  
  
Ali Alghamdi, MD

Sarah Zahrani, RN

Central  
Province

King AbdulAziz  
Cardiac Center (5)

\*Peru (4)

Walter Enrique  
Mogrovejo Ramos,  
MD

Marco Antonio  
Monsalve Davila, RN

Mirafloes

Instituto Neuro  
Cardiovascular De  
Las Americas (4)

Thailand (3)

Country Leader

Harvey Douglas White, MD

Country Coordinator

Caroline Alswailer

Srun Kuanprasert,  
MD  
Arintaya  
Prommintikul, MD  
Weerachai  
Nawarawong, MD  
Surin  
Woragidpoonpol,  
MD  
Thitipong  
Tepsuwan, MD  
Noppon  
Taksaudom, MD  
Chataroon  
Rimsukcharoenchai  
, MD  
Juntima  
Euathrongchit, MD  
Yutthaphan  
Wannasopha, MD  
Sukit Yamwong,  
MD  
Piyamitr Sritara, MD  
  
Suthara  
Aramcharoen, MD  
Krissada Meemuk,  
MD

Supatchara  
Khwakhong, RN  
Anong Chaayasri, RN

Warangkana Mekara,  
RN  
Supap Kulthawong,  
RN  
Anong Amaritakomol,  
RN

Chiang Mai

Maharaj Nakorn  
Chiang Mai Hospital  
(2)

Pachara Panpunuan,  
RN

Bangkok

Ramathibodi Hospital  
(1)

\*Malaysia (2)

Country Leader

Harvey Douglas White, MD

Country Coordinator

Caroline Alsweiler

Ahmad Khairuddin,  
MD  
Hafidz Abd Hadi,  
MD  
Shaiful Azmi  
Yahaya, MD

Noor Syamira  
Mokhtar, RN  
Nor Asiah Basri, RN  
Irni Yusnida, RN  
Humayrah Hashim

Kuala Lumpur

Institut Jantung  
Negara (2)

*\* Countries participated in Economics Quality of Life (EQoL) Questionnaires*

*\*\*This site received one participant in transfer that was randomized at another site*



**3 Supplemental Figure 1: Consort Diagram of Patient Flow**

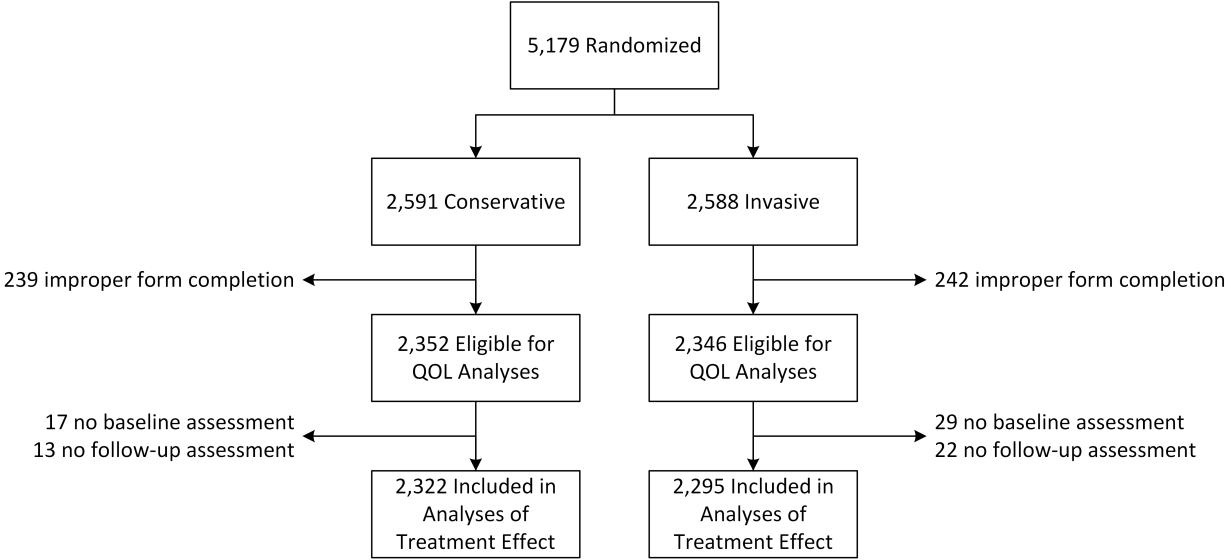

**4 Supplemental Figure 2: Distributions of the Expected Differences in Seattle Angina Questionnaire Summary Scores from an Initially Invasive Strategy**

Supplemental Figure 2A: Patients with Daily/Weekly Angina at Baseline

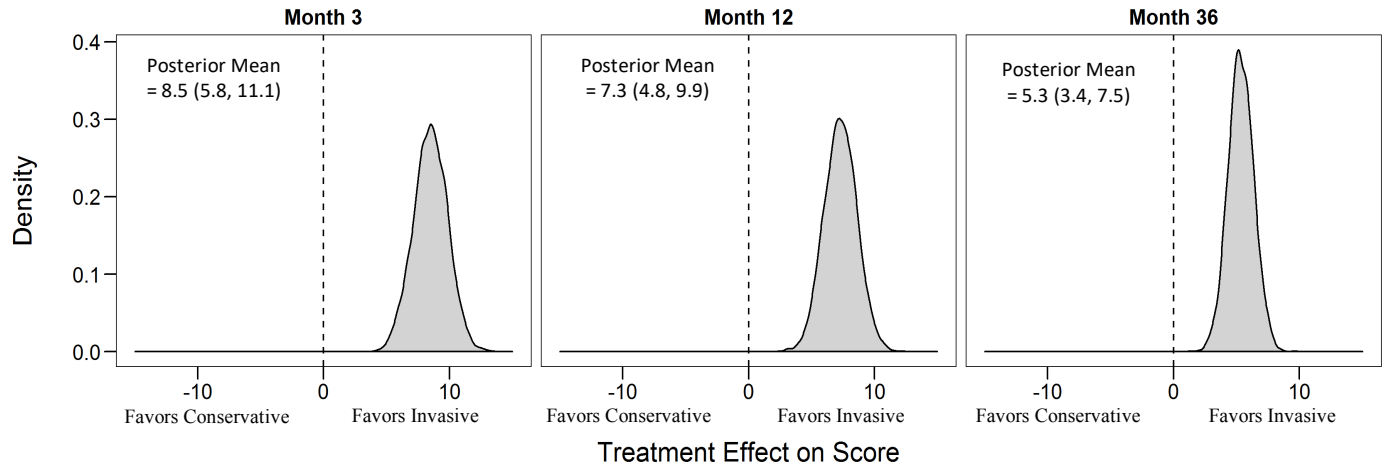

Supplemental Figure 2B: Patients with Angina Several Times per Month at Baseline

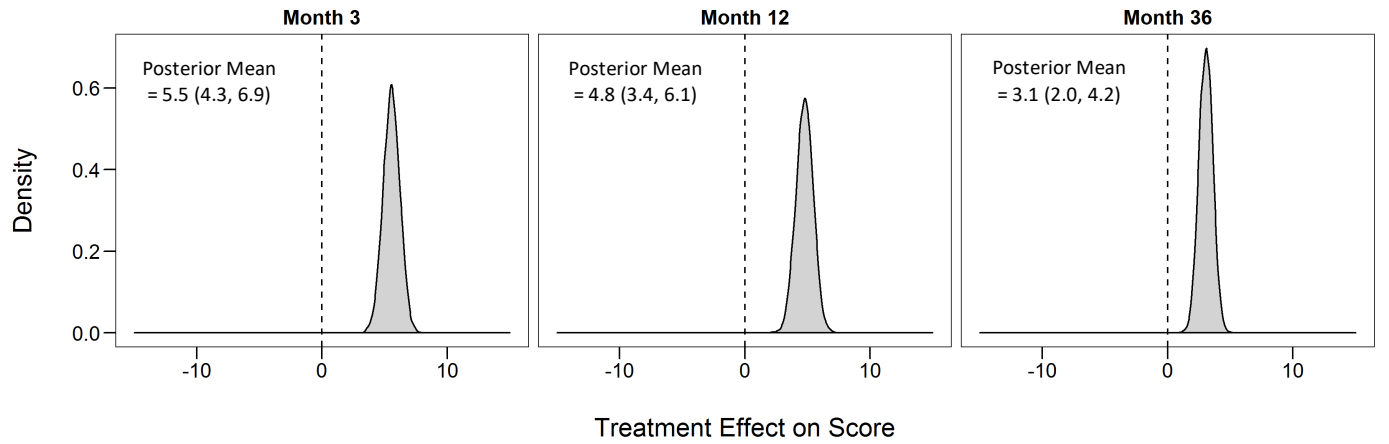

Supplemental Figure 2C: Patients with No Angina at Baseline

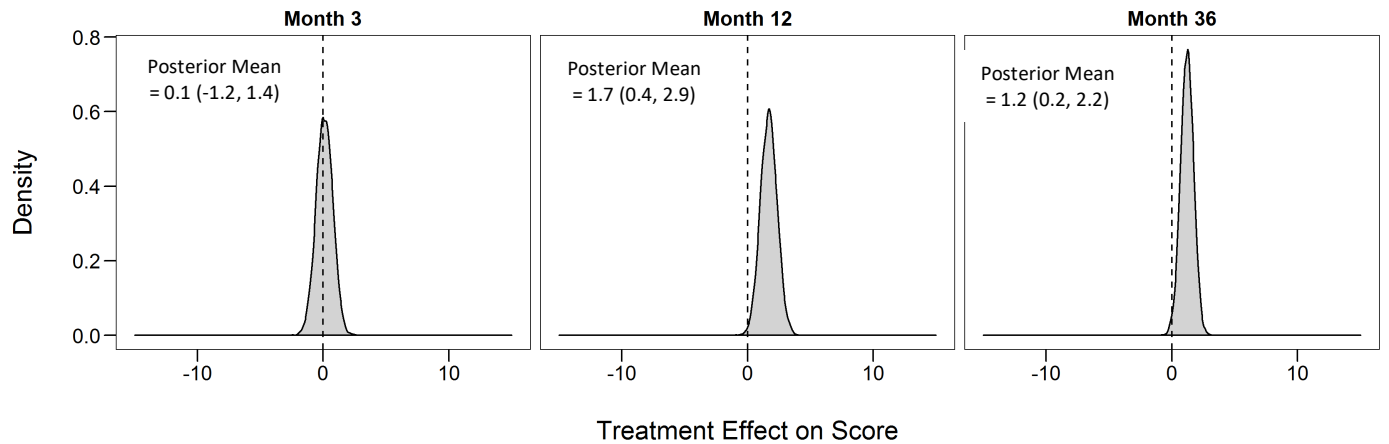

**5 Supplemental Figure 3: Effect of Treatment on SAQ Summary Score, as a Function of Patients' Baseline Angina**

**(a) Effect of Invasive vs. Conservative Treatment on SAQ Summary Score**

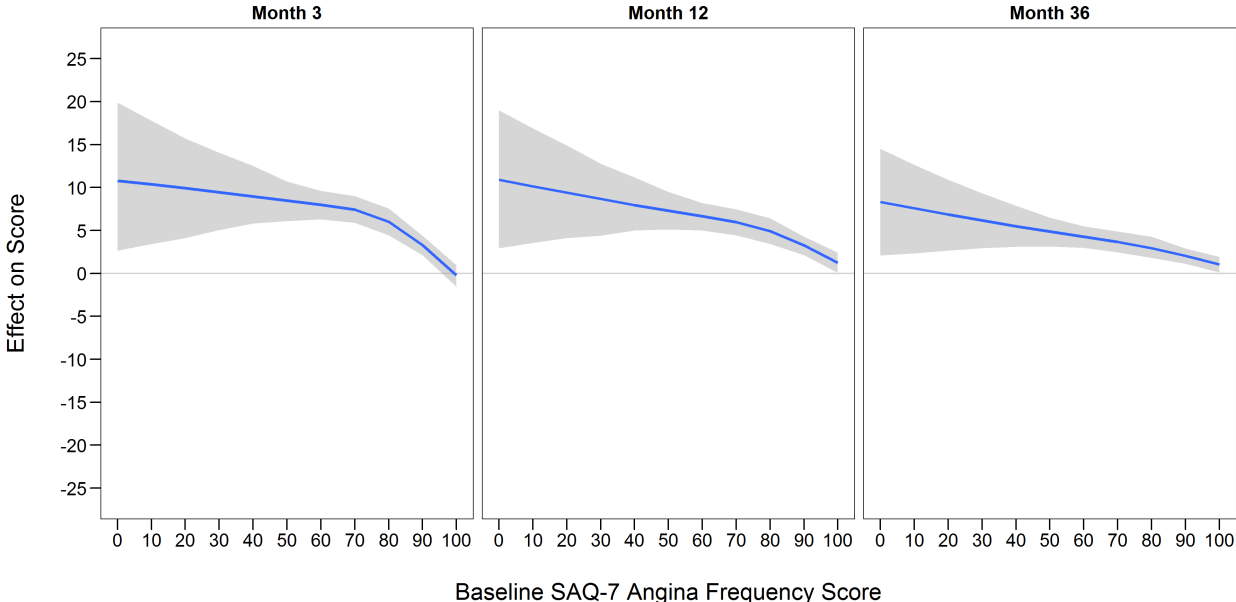

**(b) Probability of SAQ Summary Score  $\geq 75$ , by Treatment**

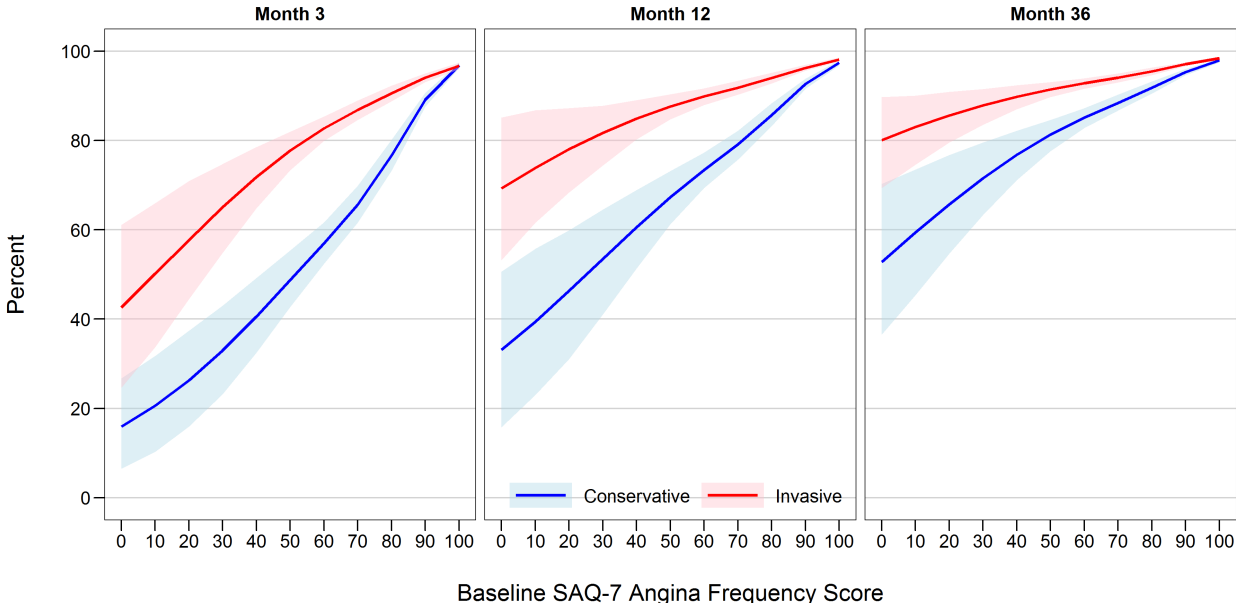

**6 Supplemental Figure 4: Effect of Treatment on SAQ Quality of Life Score, as a Function of Patients' Baseline Angina**

**(a) Effect of Invasive vs. Conservative Treatment on SAQ Quality of Life Score**

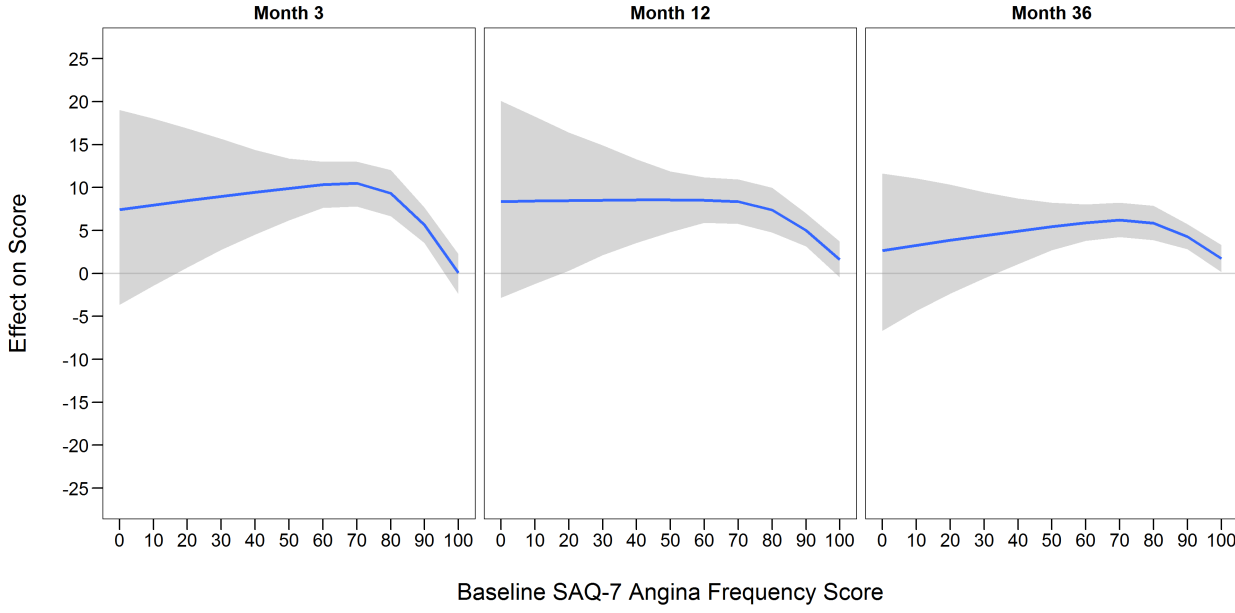

**(b) Probability of SAQ Quality of Life Score  $\geq 75$ , by Treatment**

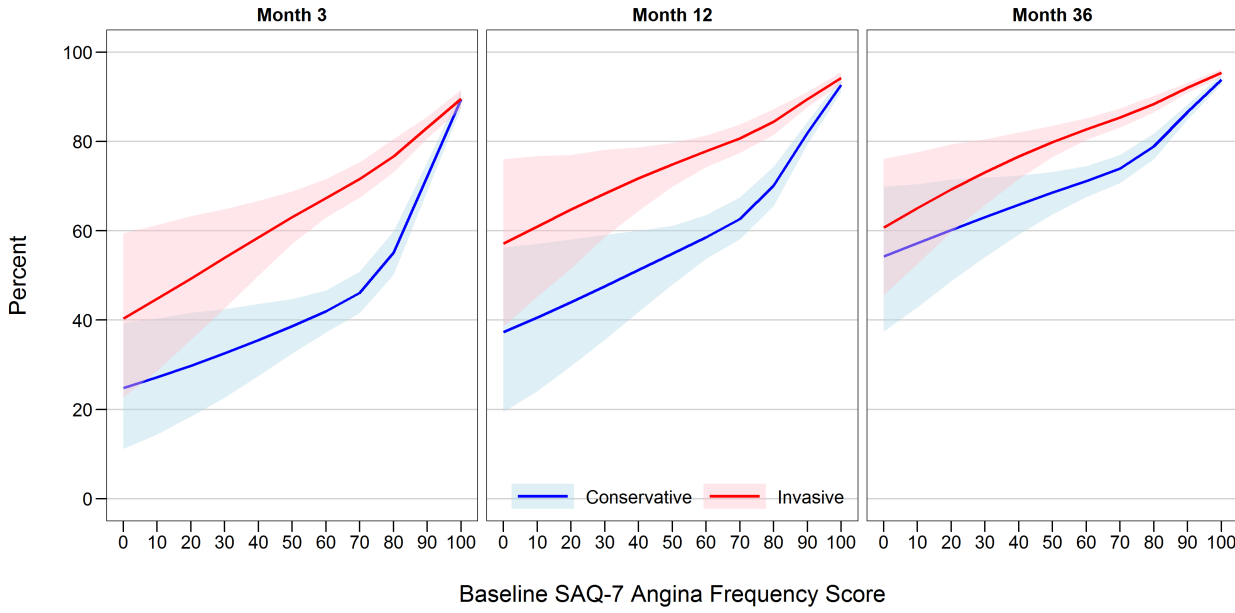

## 7 Supplemental Table 1. Baseline Characteristics of Included and Excluded Patients

|                                           | Included<br>n = 4617 | Excluded<br>n = 81 | P-Value |
|-------------------------------------------|----------------------|--------------------|---------|
| Randomized Treatment                      |                      |                    | 0.018   |
| Invasive                                  | 2295 (49.7%)         | 51 (63.0%)         |         |
| Conservative                              | 2322 (50.3%)         | 30 (37.0%)         |         |
| Age at Randomization                      |                      |                    | 0.988   |
| Mean ± SD                                 | 64.4 ± 9.5           | 64.4 ± 10.5        |         |
| Sex                                       |                      |                    | 0.833   |
| Male                                      | 3545 (76.8%)         | 63 (77.8%)         |         |
| Female                                    | 1072 (23.2%)         | 18 (22.2%)         |         |
| Race                                      |                      |                    | 0.007   |
| American Indian or Alaska Native          | 12 (0.3%)            | 0 (0.0%)           |         |
| Asian                                     | 979 (21.4%)          | 27 (34.6%)         |         |
| Native Hawaiian or Other Pacific Islander | 11 (0.2%)            | 1 (1.3%)           |         |
| Black or African American                 | 200 (4.4%)           | 4 (5.1%)           |         |
| White                                     | 3358 (73.5%)         | 45 (57.7%)         |         |
| Multiple Races                            | 10 (0.2%)            | 1 (1.3%)           |         |
| Missing                                   | 47                   | 3                  |         |
| Ethnicity                                 |                      |                    | 0.261   |
| Hispanic or Latino                        | 740 (16.0%)          | 11 (13.6%)         |         |
| Not Hispanic or Latino                    | 3526 (76.4%)         | 60 (74.1%)         |         |
| Unknown                                   | 351 (7.6%)           | 10 (12.3%)         |         |
| Hypertension                              |                      |                    | 0.013   |
| No                                        | 1086 (23.5%)         | 13 (16.0%)         |         |
| Yes                                       | 3516 (76.2%)         | 66 (81.5%)         |         |
| Unknown                                   | 15 (0.3%)            | 2 (2.5%)           |         |
| Diabetes                                  | 1836 (39.8%)         | 38 (46.9%)         | 0.192   |
| Prior MI                                  |                      |                    | 0.165   |
| No                                        | 3653 (79.1%)         | 71 (87.7%)         |         |
| Yes                                       | 951 (20.6%)          | 10 (12.3%)         |         |
| Unknown                                   | 13 (0.3%)            | 0 (0.0%)           |         |
| Baseline Smoking Status                   |                      |                    | 0.430   |
| Never Smoked                              | 1861 (40.3%)         | 36 (44.4%)         |         |
| Former Smoker                             | 2147 (46.5%)         | 32 (39.5%)         |         |
| Current Smoker                            | 607 (13.2%)          | 13 (16.0%)         |         |
| Missing                                   | 2                    |                    |         |
| CCS Angina Class                          |                      |                    | 0.917   |
| None                                      | 1005 (21.8%)         | 18 (22.2%)         |         |
| I                                         | 1302 (28.2%)         | 20 (24.7%)         |         |
| II                                        | 2094 (45.4%)         | 39 (48.1%)         |         |
| III                                       | 214 (4.6%)           | 4 (4.9%)           |         |
| IV                                        | 1 (0.0%)             | 0 (0.0%)           |         |
| Not known                                 | 1 (0.0%)             | 0 (0.0%)           |         |

|                                   | Included<br>n = 4617 | Excluded<br>n = 81 | P-Value |
|-----------------------------------|----------------------|--------------------|---------|
| New Onset Angina Within 3 Months  | 722 (16.5%)          | 6 (8.2%)           | 0.056   |
| Missing                           | 252                  | 8                  |         |
| Heart Failure                     | 1786 (38.7%)         | 34 (42.0%)         | 0.546   |
| Current NYHA Heart Failure Class  |                      |                    | 0.011   |
| I                                 | 917 (51.3%)          | 10 (29.4%)         |         |
| II                                | 869 (48.7%)          | 24 (70.6%)         |         |
| Prior Cerebrovascular Disease     | 365 (7.9%)           | 7 (8.6%)           | 0.813   |
| Missing                           | 13                   |                    |         |
| Prior Stroke                      |                      |                    | 0.128   |
| No                                | 4472 (96.9%)         | 76 (93.8%)         |         |
| Yes                               | 144 (3.1%)           | 5 (6.2%)           |         |
| Unknown                           | 1 (0.0%)             | 0 (0.0%)           |         |
| Peripheral Vascular Disease       |                      |                    | 0.505   |
| No                                | 4407 (95.5%)         | 76 (93.8%)         |         |
| Yes                               | 199 (4.3%)           | 5 (6.2%)           |         |
| Unknown                           | 11 (0.2%)            | 0 (0.0%)           |         |
| History of Depression             |                      |                    | 0.154   |
| No                                | 4258 (92.2%)         | 77 (95.1%)         |         |
| Yes                               | 339 (7.3%)           | 3 (3.7%)           |         |
| Unknown                           | 20 (0.4%)            | 1 (1.2%)           |         |
| Baseline BMI (kg/m <sup>2</sup> ) |                      |                    | 0.415   |
| Mean ± SD                         | 28.9 ± 5.2           | 28.4 ± 5.2         |         |
| Missing                           | 37                   | 6                  |         |
| Stress Test: Degree of Ischemia   |                      |                    | 0.275   |
| None                              | 247 (5.4%)           | 3 (3.8%)           |         |
| Mild                              | 331 (7.2%)           | 10 (12.5%)         |         |
| Moderate                          | 1637 (35.5%)         | 23 (28.8%)         |         |
| Severe                            | 2348 (51.0%)         | 43 (53.8%)         |         |
| Uninterpretable                   | 44 (1.0%)            | 1 (1.3%)           |         |
| Missing                           | 10                   | 1                  |         |
| Stress Test Modality              |                      |                    | 0.072   |
| Nuclear (PET/SPECT)               | 2490 (53.9%)         | 41 (50.6%)         |         |
| Echocardiographic Stress          | 1052 (22.8%)         | 12 (14.8%)         |         |
| Cardiac Magnetic Resonance        | 218 (4.7%)           | 5 (6.2%)           |         |
| ETT without Imaging               | 857 (18.6%)          | 23 (28.4%)         |         |
| Anterior Ischemia                 | 1228 (32.8%)         | 23 (41.1%)         | 0.193   |
| Missing                           | 877                  | 25                 |         |
| SAQ Summary Score                 |                      |                    | 0.092   |
| Mean ± SD                         | 74.2 ± 18.9          | 68.8 ± 21.4        |         |
| Median (IQR)                      | 77.0 (62.0, 89.0)    | 68.0 (58.0, 83.0)  |         |
| Missing                           | 2                    | 46                 |         |

|                               | <b>Included<br/>n = 4617</b> | <b>Excluded<br/>n = 81</b> | <b>P-Value</b> |
|-------------------------------|------------------------------|----------------------------|----------------|
| SAQ Physical Limitation Score |                              |                            | 0.667          |
| Mean ± SD                     | 79.3 ± 23.6                  | 77.4 ± 23.6                |                |
| Median (IQR)                  | 83.0 (67.0, 100.0)           | 79.0 (58.0, 100.0)         |                |
| Missing                       | 339                          | 53                         |                |
| SAQ Angina Frequency Score    |                              |                            | 0.301          |
| Mean ± SD                     | 81.4 ± 19.6                  | 78.0 ± 22.2                |                |
| Median (IQR)                  | 90.0 (70.0, 100.0)           | 80.0 (60.0, 100.0)         |                |
| Missing                       | 5                            | 46                         |                |
| SAQ Quality of Life Score     |                              |                            | 0.055          |
| Mean ± SD                     | 62.0 ± 26.4                  | 53.5 ± 29.2                |                |
| Median (IQR)                  | 63.0 (38.0, 88.0)            | 50.0 (25.0, 75.0)          |                |
| Missing                       | 11                           | 46                         |                |

**8 Supplemental Table 2. Brief Symptom Questionnaire Completion Rates and Reasons for Missingness**

| Month                                         | Number of Patients Who... |                                          |                              | Completed    | Skipped     | Withdrawn  | Lost to Follow-up |
|-----------------------------------------------|---------------------------|------------------------------------------|------------------------------|--------------|-------------|------------|-------------------|
|                                               | Died                      | Were Censored Due to Completion of Trial | Were Eligible for Assessment |              |             |            |                   |
| <b>Conservative Treatment Group (N=2,352)</b> |                           |                                          |                              |              |             |            |                   |
| 0                                             | 0                         | 0                                        | 2352                         | 2335 (99.3%) | 17 ( 0.7%)  | 0 ( 0.0%)  | 0 ( 0.0%)         |
| 1.5                                           | 4                         | 0                                        | 2348                         | 2146 (91.4%) | 188 ( 8.0%) | 3 ( 0.1%)  | 11 ( 0.5%)        |
| 3                                             | 7                         | 0                                        | 2345                         | 2156 (91.9%) | 164 ( 7.0%) | 4 ( 0.2%)  | 21 ( 0.9%)        |
| 6                                             | 15                        | 0                                        | 2337                         | 2188 (93.6%) | 111 ( 4.7%) | 8 ( 0.3%)  | 30 ( 1.3%)        |
| 12                                            | 27                        | 2                                        | 2323                         | 2157 (92.9%) | 114 ( 4.9%) | 11 ( 0.5%) | 41 ( 1.8%)        |
| 18                                            | 51                        | 18                                       | 2283                         | 2105 (92.2%) | 126 ( 5.5%) | 13 ( 0.6%) | 39 ( 1.7%)        |
| 24                                            | 63                        | 300                                      | 1989                         | 1799 (90.4%) | 135 ( 6.8%) | 16 ( 0.8%) | 39 ( 2.0%)        |
| 30                                            | 80                        | 638                                      | 1634                         | 1478 (90.5%) | 99 ( 6.1%)  | 17 ( 1.0%) | 40 ( 2.4%)        |
| 36                                            | 87                        | 863                                      | 1402                         | 1253 (89.4%) | 86 ( 6.1%)  | 17 ( 1.2%) | 46 ( 3.3%)        |
| 42                                            | 106                       | 1140                                     | 1106                         | 967 (87.4%)  | 78 ( 7.1%)  | 18 ( 1.6%) | 43 ( 3.9%)        |
| 48                                            | 111                       | 1376                                     | 865                          | 740 (85.5%)  | 62 ( 7.2%)  | 18 ( 2.1%) | 45 ( 5.2%)        |
| 54                                            | 118                       | 1629                                     | 605                          | 509 (84.1%)  | 42 ( 6.9%)  | 19 ( 3.1%) | 35 ( 5.8%)        |
| 60                                            | 121                       | 1815                                     | 416                          | 343 (82.5%)  | 24 ( 5.8%)  | 19 ( 4.6%) | 30 ( 7.2%)        |
| 66                                            | 128                       | 1988                                     | 236                          | 183 (77.5%)  | 9 ( 3.8%)   | 20 ( 8.5%) | 24 (10.2%)        |
| 72                                            | 129                       | 2113                                     | 110                          | 69 (62.7%)   | 0 ( 0.0%)   | 20 (18.2%) | 21 (19.1%)        |
| 78                                            | 129                       | 2177                                     | 46                           | 5 (10.9%)    | 0 ( 0.0%)   | 20 (43.5%) | 21 (45.7%)        |
| <b>Invasive Treatment Group (N=2,346)</b>     |                           |                                          |                              |              |             |            |                   |
| 0                                             | 0                         | 0                                        | 2346                         | 2317 (98.8%) | 29 ( 1.2%)  | 0 ( 0.0%)  | 0 ( 0.0%)         |
| 1.5                                           | 6                         | 0                                        | 2340                         | 2051 (87.6%) | 270 (11.5%) | 4 ( 0.2%)  | 15 ( 0.6%)        |
| 3                                             | 13                        | 0                                        | 2333                         | 2064 (88.5%) | 231 ( 9.9%) | 10 ( 0.4%) | 28 ( 1.2%)        |
| 6                                             | 18                        | 0                                        | 2328                         | 2175 (93.4%) | 107 ( 4.6%) | 13 ( 0.6%) | 33 ( 1.4%)        |
| 12                                            | 39                        | 0                                        | 2307                         | 2132 (92.4%) | 118 ( 5.1%) | 13 ( 0.6%) | 44 ( 1.9%)        |
| 18                                            | 53                        | 13                                       | 2280                         | 2090 (91.7%) | 125 ( 5.5%) | 13 ( 0.6%) | 52 ( 2.3%)        |
| 24                                            | 66                        | 295                                      | 1985                         | 1806 (91.0%) | 111 ( 5.6%) | 14 ( 0.7%) | 54 ( 2.7%)        |
| 30                                            | 78                        | 640                                      | 1628                         | 1457 (89.5%) | 101 ( 6.2%) | 16 ( 1.0%) | 54 ( 3.3%)        |
| 36                                            | 91                        | 871                                      | 1384                         | 1213 (87.6%) | 100 ( 7.2%) | 17 ( 1.2%) | 54 ( 3.9%)        |
| 42                                            | 107                       | 1142                                     | 1097                         | 957 (87.2%)  | 70 ( 6.4%)  | 18 ( 1.6%) | 52 ( 4.7%)        |
| 48                                            | 119                       | 1381                                     | 846                          | 731 (86.4%)  | 52 ( 6.1%)  | 18 ( 2.1%) | 45 ( 5.3%)        |
| 54                                            | 123                       | 1625                                     | 598                          | 503 (84.1%)  | 37 ( 6.2%)  | 18 ( 3.0%) | 40 ( 6.7%)        |
| 60                                            | 130                       | 1827                                     | 389                          | 321 (82.5%)  | 15 ( 3.9%)  | 18 ( 4.6%) | 35 ( 9.0%)        |
| 66                                            | 136                       | 1988                                     | 222                          | 165 (74.3%)  | 10 ( 4.5%)  | 19 ( 8.6%) | 28 (12.6%)        |
| 72                                            | 136                       | 2097                                     | 113                          | 65 (57.5%)   | 2 ( 1.8%)   | 19 (16.8%) | 27 (23.9%)        |
| 78                                            | 136                       | 2157                                     | 53                           | 8 (15.1%)    | 0 ( 0.0%)   | 19 (35.8%) | 26 (49.1%)        |



**9 Supplemental Table 3: Odds Ratios (95% Highest Posterior Density Intervals) for Better Health Status with the Invasive vs. Conservative Strategy, by Time of Follow Up**

| <b>Month</b> | <b>SAQ-7 Summary Score</b> | <b>SAQ-7 Angina Frequency Score</b> | <b>SAQ-7 Quality of Life Score</b> | <b>SAQ-7 Physical Limitation Score</b> | <b>Rose Dyspnea Score</b> | <b>EQ-5D Visual Analog Scale</b> |
|--------------|----------------------------|-------------------------------------|------------------------------------|----------------------------------------|---------------------------|----------------------------------|
| 1.5          | 1.51 (1.29, 1.75)          | 1.76 (1.47, 2.05)                   | 1.35 (1.14, 1.56)                  | 1.17 (0.98, 1.38)                      | 1.55 (1.31, 1.81)         | 1.34 (1.14, 1.56)                |
| 3            | 2.09 (1.76, 2.45)          | 2.99 (2.43, 3.57)                   | 1.93 (1.59, 2.26)                  | 1.42 (1.15, 1.71)                      | 1.68 (1.38, 2.01)         | 1.56 (1.30, 1.83)                |
| 6            | 2.33 (1.93, 2.77)          | 3.17 (2.52, 3.90)                   | 2.09 (1.72, 2.49)                  | 1.75 (1.37, 2.15)                      | 1.66 (1.34, 2.04)         | 1.92 (1.59, 2.30)                |
| 12           | 2.29 (1.89, 2.71)          | 2.95 (2.30, 3.65)                   | 1.98 (1.60, 2.35)                  | 1.94 (1.50, 2.39)                      | 1.68 (1.31, 2.05)         | 1.75 (1.43, 2.07)                |
| 24           | 1.80 (1.52, 2.12)          | 2.01 (1.61, 2.44)                   | 1.74 (1.45, 2.04)                  | 1.62 (1.28, 1.97)                      | 1.44 (1.17, 1.73)         | 1.44 (1.20, 1.69)                |
| 36           | 1.87 (1.59, 2.18)          | 2.11 (1.73, 2.55)                   | 1.81 (1.52, 2.10)                  | 1.68 (1.35, 2.05)                      | 1.44 (1.17, 1.69)         | 1.52 (1.27, 1.78)                |
| 48           | 1.96 (1.57, 2.36)          | 2.23 (1.66, 2.81)                   | 1.89 (1.52, 2.30)                  | 1.75 (1.30, 2.23)                      | 1.44 (1.12, 1.78)         | 1.60 (1.28, 1.93)                |

**10 Supplemental Table 4: Treatment Effect on Predicted Time-Averaged Scores through 48 Months for a Typical Patient Posterior Means and 95% Highest Posterior Density Intervals**

**All Patients**

|                              | <b>CON</b>        | <b>INV</b>        | <b>Difference</b> |
|------------------------------|-------------------|-------------------|-------------------|
| SAQ-7 Summary Score          | 86.0 (85.4, 86.6) | 89.3 (88.8, 89.8) | 3.3 (2.7, 4.0)    |
| SAQ-7 Angina Frequency Score | 94.0 (93.5, 94.6) | 96.8 (96.5, 97.1) | 2.8 (2.3, 3.3)    |
| SAQ-7 Quality of Life Score  | 79.0 (78.0, 80.0) | 84.0 (83.1, 84.9) | 5.0 (3.9, 6.1)    |

**Daily/Weekly Angina**

|                              | <b>CON</b>        | <b>INV</b>        | <b>Difference</b> |
|------------------------------|-------------------|-------------------|-------------------|
| SAQ-7 Summary Score          | 78.9 (77.3, 80.6) | 85.2 (83.8, 86.5) | 6.3 (4.4, 8.0)    |
| SAQ-7 Angina Frequency Score | 87.4 (85.9, 89.0) | 93.7 (92.7, 94.6) | 6.2 (4.5, 8.1)    |
| SAQ-7 Quality of Life Score  | 69.6 (67.4, 71.9) | 77.0 (74.9, 79.0) | 7.4 (4.8, 10.1)   |

**Monthly Angina**

|                              | <b>CON</b>        | <b>INV</b>        | <b>Difference</b> |
|------------------------------|-------------------|-------------------|-------------------|
| SAQ-7 Summary Score          | 85.2 (84.4, 86.0) | 88.9 (88.2, 89.6) | 3.7 (2.7, 4.6)    |
| SAQ-7 Angina Frequency Score | 94.2 (93.6, 94.8) | 97.0 (96.6, 97.3) | 2.8 (2.1, 3.4)    |
| SAQ-7 Quality of Life Score  | 77.2 (75.7, 78.6) | 83.3 (82.0, 84.6) | 6.2 (4.5, 7.8)    |

**No Angina**

|                              | <b>CON</b>        | <b>INV</b>        | <b>Difference</b> |
|------------------------------|-------------------|-------------------|-------------------|
| SAQ-7 Summary Score          | 91.5 (90.7, 92.2) | 92.6 (91.8, 93.3) | 1.1 (0.2, 1.9)    |
| SAQ-7 Angina Frequency Score | 98.9 (98.7, 99.1) | 99.3 (99.1, 99.4) | 0.4 (0.2, 0.6)    |
| SAQ-7 Quality of Life Score  | 86.8 (85.3, 88.4) | 88.8 (87.3, 90.2) | 2.0 (0.4, 3.6)    |

**11 Supplemental Table 5. Odds Ratios for Higher SAQ-7 Summary Score with the Invasive vs. Conservative Strategy based on Joint Model with Survival**

| <b>Month</b> | <b>Primary Analysis Model Ignoring Deaths</b> | <b>Joint Model with Survival</b> |
|--------------|-----------------------------------------------|----------------------------------|
| 1.5          | 1.51 (1.29, 1.75)                             | 1.51 (1.29, 1.74)                |
| 3            | 2.09 (1.76, 2.45)                             | 2.09 (1.76, 2.45)                |
| 6            | 2.33 (1.93, 2.77)                             | 2.33 (1.93, 2.76)                |
| 12           | 2.29 (1.89, 2.71)                             | 2.28 (1.85, 2.69)                |
| 24           | 1.80 (1.52, 2.12)                             | 1.79 (1.49, 2.09)                |
| 36           | 1.87 (1.59, 2.18)                             | 1.87 (1.58, 2.18)                |
| 48           | 1.96 (1.57, 2.36)                             | 1.95 (1.57, 2.35)                |

## 12 Supplemental Table 6 – Interpreting the SAQ-7 and Clinically-important Intra-individual Changes in Scores

When interpreting health status outcomes, it is critically important to understand the clinical importance of differences in PROs. Mean differences of a continuous variable between groups in a clinical trial, such as ISCHEMIA, represent population averages, and do not shed much light on the impact of treatment on an individual patient’s change in health status, which depends strongly on where they start. Some patients have much larger, while others have much smaller, changes in health status. The primary analysis in ISCHEMIA tests whether or not, on average, there were larger changes with the invasive, as compared with the conservative, strategy. From the Bayesian analyses, there is almost zero probability that there was no average benefit from an invasive strategy in the overall population, although the benefit was much larger in those with more frequent angina and non-existent at 3 months in those without angina. Nevertheless, trying to infer clinical significance from the mean changes across the population is not an appropriate way to understand the benefits to future patients presenting for care and wanting to engage in shared decision-making about their treatment. Specifically, dichotomizing the mean differences in the population as being – or not being – clinically significant runs counter to the goals of supporting more personalized, patient-centered care.

Accordingly, once it was determined that there was a significant average benefit from an invasive strategy, we sought to define how many patients realized a clinically significant benefit. This is a matter of interpretation, as what is clinically important is a judgment that lies in the eyes of the beholder. We do not feel confident defining what is ‘clinically important,’ as we believe that this information should be shared with patients and that patients should be empowered to define whether or not that magnitude of difference is important to them. The primary effort in the main paper was to show the proportion of patients, as a function of their baseline angina, who were either angina free (SAQ Angina Frequency score = 100; Figure 3) or had good to excellent health status (SAQ Summary Score  $\geq 75$ ; Figure S3) or good to excellent disease-specific quality of life (SAQ Quality of Life score  $\geq 75$ ; Figure S4).

An alternative approach is to examine what is a clinically important difference in SAQ scales. To gain a better appreciation of this, we propose first looking at the instrument itself to provide a clinical context for interpreting the clinical importance of intra-individual changes in scores. Because the SAQ items have Likert responses, each category of response will have a different impact on that domain’s score. This is because the scales are normalized to a range of 0 to 100, which higher scores indicating better health status, to facilitate interpretability. From the ‘shift’ in score for each scale, a clinical insight into what different scores mean can be gained. This strategy has been described by Wyrwich et al. (Am Heart J 2004;147:615–22.). Using the SAQ Angina Frequency scale as an example, we provide the exact items that define the score below:

1. Over the past 4 weeks, on average, how many times have you had **chest pain, chest tightness or angina**?

I have had **chest pain, chest tightness or angina**...

|                          |                          |                          |                          |                          |                          |
|--------------------------|--------------------------|--------------------------|--------------------------|--------------------------|--------------------------|
|                          |                          | 3 or more                |                          |                          |                          |
| 4 or more                | 1-3 times                | times per week           | 1-2 times                | Less than                | None over the            |
| times per day            | per day                  | but not every day        | per week                 | once a week              | past 4 weeks             |
| <input type="checkbox"/> |

---

2. Over the past 4 weeks, on average, how many times have you had to take nitroglycerin (nitroglycerin tablets or spray) for your **chest pain, chest tightness or angina**?

I have taken nitroglycerin...

|                          |                          |                          |                          |                          |                          |                          |
|--------------------------|--------------------------|--------------------------|--------------------------|--------------------------|--------------------------|--------------------------|
|                          |                          | 3 or more                |                          |                          |                          |                          |
| 4 or more                | 1-3 times                | times per week           | 1-2 times                | Less than                | None over the            |                          |
| times per day            | per day                  | but not every day        | per week                 | once a week              | past 4 weeks             |                          |
| <input type="checkbox"/> |

Each 'shift' in response on either of these 2 items changes the SAQ Angina Frequency score by 10 points. For example, if a patient had angina 1-2 times per week at baseline and took no nitroglycerin, then they would have a score of 80. If they went from 1-2 angina episodes per week to less than 1 episode a week, that would be a change of 10 points, resulting in an Angina Frequency score of 90. While many would view such a change (from 1-2 times/week to less than once a week) as clinically important, others may feel that a 20-point change is minimally important. We often use these thresholds of clinically important change in responder analyses to show the proportion of patients who have experienced clinical changes of different magnitudes.

Importantly, we do not feel it is correct to apply this to mean differences in a population. For example, if there were a 10-point difference, on average, in the population, almost certainly many patients would have changes >10 while many would have changes <10. That is why we are very hesitant to artificially categorize the mean differences in the population as clinically important or not.

While we consider a 10-point change for an individual in the SAQ Angina Frequency scale to be clinically important, different thresholds are needed for the SAQ Summary Score. We believe that a 5-point or greater difference in SAQ Summary Score for an individual is clinically important. To support this assertion, we graphed the impact on the score for each 'shift' in response on one of the 7 items (the first 3 are the SAQ Physical Limitation items, the next 2 are the SAQ Angina Frequency Scale and the last 2 are the SAQ Quality of Life items). While different shifts in different items alter the Summary Score differently, it is clear that there is no change in any single response that would change the SAQ Summary Score by >5 points. When we declare that a 5-point change is clinically important, we are demanding that at least 2 items improve by one category, or that at least one item improve by 2 categories. To define the face validity of these shifts, the SAQ-7 questionnaire is provided in Section 11 of this Supplement.

### Change in SAQ-7 Summary Score Per Unit Increase in Item Response

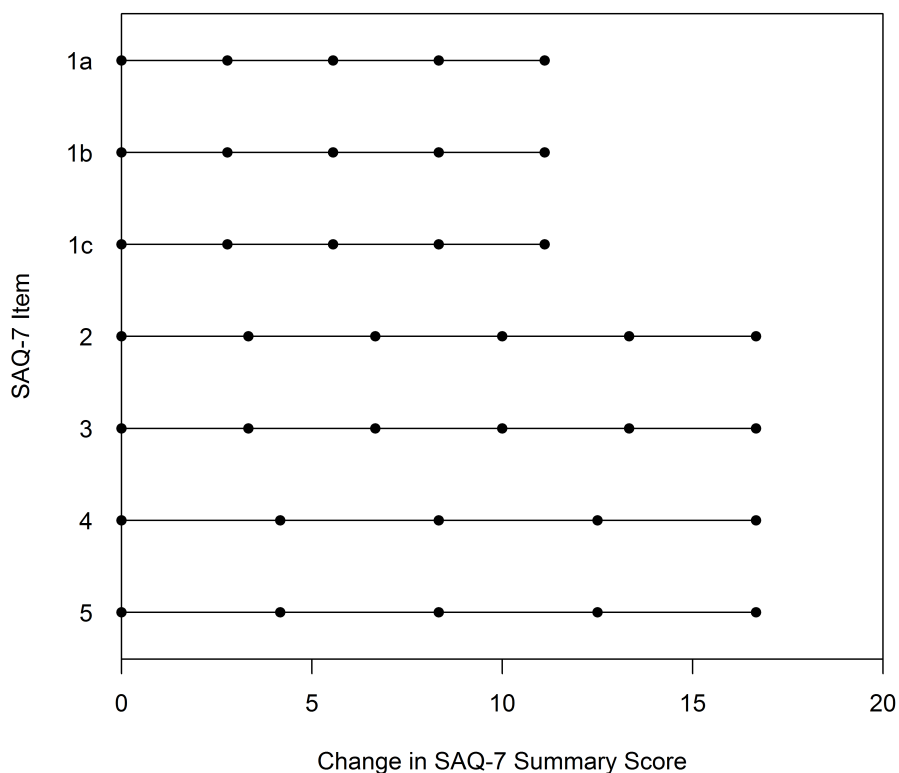

To provide insights into the likelihood of small, but important (defined as  $\geq 10$  points on the SAQ Angina Frequency scale and  $\geq 5$  points on the SAQ Summary Score) clinical changes or a moderate to large clinical change (defined as  $\geq 20$  points on the SAQ Angina Frequency scale and  $\geq 10$  points on the SAQ Summary Score), we show in the tables below the model-estimated probability in each arm of a typical patient experiencing these magnitudes of changes at 3, 12 and 36, as a function of their baseline angina frequency. When interpreting these differences, it is important to realize that there is less difference in those with severe angina and those with minimal angina at the time of randomization. This is because the use of guideline-based medical therapy improved health status outcomes in the most symptomatic patients beyond these minimal thresholds (e.g. both a patient with a 20-point improvement and one with an 80-point improvement who had a baseline Angina Frequency score of 20 would exceed a 10- or 20-point improvement threshold, although the latter patient clearly got more benefit and would be angina-free) is not captured by this type of responder analysis. For those with minimal angina at randomization, there was limited opportunity to further improve. Accordingly, we feel that describing the proportion who were angina-free at follow-up (Figure 3 of the paper) is more helpful in applying the results of ISCHEMIA to future patients.

Probability of Improvement  $\geq 5$  Points (95% Credible Interval) in SAQ-7 Summary Score, as function of Baseline Angina Frequency over time

| Baseline SAQ-7 Angina |                 |                | Invasive             | Conservative         | Difference        |
|-----------------------|-----------------|----------------|----------------------|----------------------|-------------------|
| Month                 | Frequency Score |                |                      |                      |                   |
| 3                     | Daily Angina    | 0              | 100.0 (100.0, 100.0) | 99.9 (99.9, 100.0)   | 0.0 (0.0, 0.1)    |
|                       |                 | 10             | 99.9 (99.9, 100.0)   | 99.8 (99.6, 99.9)    | 0.2 (0.0, 0.3)    |
|                       |                 | 20             | 99.8 (99.7, 99.9)    | 99.3 (98.8, 99.6)    | 0.5 (0.2, 1.0)    |
|                       | Weekly Angina   | 30             | 99.5 (99.3, 99.7)    | 98.2 (97.3, 99.0)    | 1.3 (0.5, 2.2)    |
|                       |                 | 40             | 98.8 (98.4, 99.2)    | 95.8 (94.3, 97.1)    | 3.1 (1.7, 4.6)    |
|                       |                 | 50             | 97.4 (96.7, 98.0)    | 90.9 (88.8, 93.1)    | 6.4 (4.3, 8.7)    |
|                       | Monthly Angina  | 60             | 94.2 (93.1, 95.2)    | 81.8 (78.9, 84.6)    | 12.4 (9.4, 15.4)  |
|                       |                 | 70             | 86.8 (84.5, 89.0)    | 65.6 (61.5, 69.8)    | 21.2 (16.6, 25.8) |
|                       |                 | 80             | 60.6 (55.7, 65.4)    | 34.4 (30.2, 39.0)    | 26.1 (19.5, 32.5) |
|                       | No Angina       | 90             | 29.0 (25.6, 32.4)    | 17.5 (15.1, 19.7)    | 11.5 (7.3, 15.5)  |
| 100                   |                 | 0.0 (0.0, 0.0) | 0.0 (0.0, 0.0)       | 0.0 (0.0, 0.0)       |                   |
| 12                    | Daily Angina    | 0              | 100.0 (100.0, 100.0) | 100.0 (100.0, 100.0) | 0.0 (0.0, 0.0)    |
|                       |                 | 10             | 100.0 (100.0, 100.0) | 99.9 (99.9, 100.0)   | 0.1 (0.0, 0.1)    |
|                       |                 | 20             | 99.9 (99.9, 100.0)   | 99.7 (99.5, 99.9)    | 0.2 (0.1, 0.4)    |
|                       | Weekly Angina   | 30             | 99.8 (99.7, 99.9)    | 99.2 (98.8, 99.6)    | 0.6 (0.2, 1.0)    |
|                       |                 | 40             | 99.5 (99.3, 99.7)    | 98.1 (97.4, 98.8)    | 1.4 (0.7, 2.2)    |
|                       |                 | 50             | 98.7 (98.3, 99.0)    | 95.6 (94.4, 96.7)    | 3.1 (2.0, 4.3)    |
|                       | Monthly Angina  | 60             | 96.8 (96.1, 97.4)    | 90.3 (88.5, 92.1)    | 6.4 (4.6, 8.3)    |
|                       |                 | 70             | 91.8 (90.3, 93.3)    | 79.1 (75.7, 82.1)    | 12.7 (9.3, 16.3)  |
|                       |                 | 80             | 71.3 (67.1, 75.7)    | 48.9 (43.7, 53.9)    | 22.4 (15.8, 29.0) |
|                       | No Angina       | 90             | 40.0 (36.1, 44.3)    | 24.7 (21.7, 27.9)    | 15.3 (10.2, 20.4) |
| 100                   |                 | 0.0 (0.0, 0.0) | 0.0 (0.0, 0.0)       | 0.0 (0.0, 0.0)       |                   |
| 36                    | Daily Angina    | 0              | 100.0 (100.0, 100.0) | 100.0 (100.0, 100.0) | 0.0 (0.0, 0.0)    |
|                       |                 | 10             | 100.0 (100.0, 100.0) | 100.0 (99.9, 100.0)  | 0.0 (0.0, 0.0)    |
|                       |                 | 20             | 100.0 (99.9, 100.0)  | 99.9 (99.8, 99.9)    | 0.1 (0.0, 0.2)    |
|                       | Weekly Angina   | 30             | 99.9 (99.8, 99.9)    | 99.6 (99.5, 99.8)    | 0.2 (0.1, 0.4)    |
|                       |                 | 40             | 99.7 (99.6, 99.8)    | 99.1 (98.8, 99.4)    | 0.6 (0.3, 0.8)    |
|                       |                 | 50             | 99.1 (98.9, 99.3)    | 97.9 (97.4, 98.4)    | 1.2 (0.7, 1.8)    |
|                       | Monthly Angina  | 60             | 97.8 (97.4, 98.1)    | 95.1 (94.3, 95.9)    | 2.7 (1.8, 3.6)    |
|                       |                 | 70             | 94.0 (93.0, 95.0)    | 88.4 (86.6, 90.2)    | 5.6 (3.6, 7.7)    |
|                       |                 | 80             | 76.9 (73.4, 80.0)    | 64.2 (60.0, 68.4)    | 12.7 (7.6, 18.2)  |
|                       | No Angina       | 90             | 46.0 (42.3, 49.7)    | 34.6 (31.4, 38.1)    | 11.5 (6.4, 16.2)  |
| 100                   |                 | 0.0 (0.0, 0.0) | 0.0 (0.0, 0.0)       | 0.0 (0.0, 0.0)       |                   |

Probability of Improvement  $\geq 10$  Points (95% Credible Interval) in SAQ-7 Summary Score, as function of Baseline Angina Frequency over time

| Baseline SAQ-7 Angina |                 |                | Invasive             | Conservative         | Difference        |
|-----------------------|-----------------|----------------|----------------------|----------------------|-------------------|
| Month                 | Frequency Score |                |                      |                      |                   |
| 3                     | Daily Angina    | 0              | 100.0 (99.9, 100.0)  | 99.9 (99.7, 100.0)   | 0.1 (0.0, 0.2)    |
|                       |                 | 10             | 99.9 (99.8, 100.0)   | 99.6 (99.2, 99.8)    | 0.3 (0.1, 0.7)    |
|                       |                 | 20             | 99.7 (99.5, 99.8)    | 98.7 (97.9, 99.4)    | 1.0 (0.3, 1.8)    |
|                       | Weekly Angina   | 30             | 99.1 (98.7, 99.5)    | 96.7 (95.1, 98.1)    | 2.5 (1.0, 4.1)    |
|                       |                 | 40             | 97.9 (97.1, 98.6)    | 92.6 (90.1, 94.9)    | 5.3 (3.0, 8.1)    |
|                       |                 | 50             | 95.4 (94.2, 96.5)    | 84.9 (81.5, 88.2)    | 10.5 (7.0, 13.9)  |
|                       | Monthly Angina  | 60             | 89.7 (87.8, 91.4)    | 70.6 (66.8, 74.7)    | 19.0 (14.6, 23.2) |
|                       |                 | 70             | 74.5 (70.9, 78.1)    | 45.8 (41.3, 50.4)    | 28.7 (23.1, 34.6) |
|                       |                 | 80             | 40.4 (35.6, 45.4)    | 18.8 (15.8, 21.8)    | 21.6 (15.9, 27.2) |
|                       | No Angina       | 90             | 13.4 (11.6, 15.4)    | 7.4 (6.3, 8.5)       | 6.0 (3.8, 8.2)    |
|                       | 100             | 0.0 (0.0, 0.0) | 0.0 (0.0, 0.0)       | 0.0 (0.0, 0.0)       |                   |
| 12                    | Daily Angina    | 0              | 100.0 (100.0, 100.0) | 100.0 (99.9, 100.0)  | 0.0 (0.0, 0.1)    |
|                       |                 | 10             | 100.0 (99.9, 100.0)  | 99.8 (99.7, 99.9)    | 0.1 (0.0, 0.3)    |
|                       |                 | 20             | 99.9 (99.8, 99.9)    | 99.5 (99.1, 99.7)    | 0.4 (0.1, 0.8)    |
|                       | Weekly Angina   | 30             | 99.6 (99.4, 99.8)    | 98.6 (97.8, 99.2)    | 1.1 (0.4, 1.8)    |
|                       |                 | 40             | 99.0 (98.7, 99.4)    | 96.6 (95.3, 97.7)    | 2.5 (1.3, 3.8)    |
|                       |                 | 50             | 97.7 (97.0, 98.2)    | 92.4 (90.5, 94.3)    | 5.2 (3.4, 7.4)    |
|                       | Monthly Angina  | 60             | 94.1 (92.9, 95.2)    | 83.4 (80.5, 86.1)    | 10.8 (7.7, 13.7)  |
|                       |                 | 70             | 83.3 (80.4, 85.9)    | 62.7 (58.1, 67.2)    | 20.6 (15.2, 25.8) |
|                       |                 | 80             | 52.3 (47.0, 57.4)    | 29.7 (25.5, 34.1)    | 22.6 (15.8, 29.2) |
|                       | No Angina       | 90             | 20.2 (17.5, 23.0)    | 11.1 (9.6, 12.9)     | 9.1 (5.9, 12.3)   |
|                       | 100             | 0.0 (0.0, 0.0) | 0.0 (0.0, 0.0)       | 0.0 (0.0, 0.0)       |                   |
| 36                    | Daily Angina    | 0              | 100.0 (100.0, 100.0) | 100.0 (100.0, 100.0) | 0.0 (0.0, 0.0)    |
|                       |                 | 10             | 100.0 (100.0, 100.0) | 99.9 (99.9, 100.0)   | 0.1 (0.0, 0.1)    |
|                       |                 | 20             | 99.9 (99.9, 100.0)   | 99.8 (99.6, 99.9)    | 0.2 (0.0, 0.3)    |
|                       | Weekly Angina   | 30             | 99.8 (99.7, 99.9)    | 99.3 (99.1, 99.6)    | 0.4 (0.2, 0.7)    |
|                       |                 | 40             | 99.4 (99.2, 99.6)    | 98.4 (97.9, 98.9)    | 1.0 (0.5, 1.5)    |
|                       |                 | 50             | 98.4 (98.1, 98.8)    | 96.3 (95.4, 97.1)    | 2.2 (1.3, 3.1)    |
|                       | Monthly Angina  | 60             | 95.9 (95.2, 96.5)    | 91.2 (89.8, 92.6)    | 4.7 (3.2, 6.2)    |
|                       |                 | 70             | 87.4 (85.5, 89.4)    | 77.2 (74.0, 80.1)    | 10.3 (6.9, 14.0)  |
|                       |                 | 80             | 59.6 (55.1, 64.1)    | 44.2 (39.7, 48.7)    | 15.3 (9.4, 22.0)  |
|                       | No Angina       | 90             | 24.4 (21.7, 27.3)    | 16.7 (14.7, 18.8)    | 7.8 (4.3, 11.1)   |
|                       | 100             | 0.0 (0.0, 0.0) | 0.0 (0.0, 0.0)       | 0.0 (0.0, 0.0)       |                   |



Probability of Improvement  $\geq$  10 Points (95% Credible Interval) in SAQ-7 Angina Frequency Score, as function of Baseline Angina Frequency over time

| Baseline SAQ-7 Angina |                 |                | Invasive             | Conservative        | Difference        |
|-----------------------|-----------------|----------------|----------------------|---------------------|-------------------|
| Month                 | Frequency Score |                |                      |                     |                   |
| 3                     | Daily Angina    | 0              | 99.9 (99.9, 100.0)   | 99.7 (99.4, 99.9)   | 0.3 (0.0, 0.5)    |
|                       |                 | 10             | 99.9 (99.9, 100.0)   | 99.6 (99.4, 99.9)   | 0.3 (0.1, 0.6)    |
|                       |                 | 20             | 99.7 (99.5, 99.9)    | 98.4 (97.4, 99.2)   | 1.3 (0.4, 2.2)    |
|                       | Weekly Angina   | 30             | 99.6 (99.4, 99.8)    | 98.0 (97.1, 98.8)   | 1.6 (0.8, 2.5)    |
|                       |                 | 40             | 99.1 (98.8, 99.4)    | 95.8 (94.3, 97.1)   | 3.4 (2.0, 4.8)    |
|                       |                 | 50             | 98.7 (98.4, 99.1)    | 94.1 (92.7, 95.5)   | 4.6 (3.2, 6.1)    |
|                       | Monthly Angina  | 60             | 97.0 (96.4, 97.6)    | 87.0 (84.9, 89.2)   | 9.9 (7.7, 12.1)   |
|                       |                 | 70             | 94.9 (93.9, 95.9)    | 80.4 (77.6, 83.2)   | 14.5 (11.4, 17.3) |
|                       |                 | 80             | 87.4 (85.0, 89.8)    | 64.3 (59.9, 68.5)   | 23.1 (18.3, 28.1) |
|                       | No Angina       | 90             | 81.1 (78.3, 84.0)    | 62.4 (58.7, 66.3)   | 18.6 (13.7, 23.3) |
| No Angina             | 100             | 0.0 (0.0, 0.0) | 0.0 (0.0, 0.0)       | 0.0 (0.0, 0.0)      |                   |
| 12                    | Daily Angina    | 0              | 100.0 (100.0, 100.0) | 99.9 (99.8, 100.0)  | 0.1 (0.0, 0.2)    |
|                       |                 | 10             | 100.0 (99.9, 100.0)  | 99.9 (99.7, 100.0)  | 0.1 (0.0, 0.2)    |
|                       |                 | 20             | 99.9 (99.8, 99.9)    | 99.3 (98.9, 99.7)   | 0.5 (0.1, 1.0)    |
|                       | Weekly Angina   | 30             | 99.8 (99.7, 99.9)    | 99.2 (98.7, 99.5)   | 0.7 (0.3, 1.1)    |
|                       |                 | 40             | 99.6 (99.4, 99.7)    | 98.2 (97.4, 98.8)   | 1.4 (0.7, 2.1)    |
|                       |                 | 50             | 99.4 (99.2, 99.5)    | 97.4 (96.7, 98.1)   | 1.9 (1.2, 2.7)    |
|                       | Monthly Angina  | 60             | 98.4 (98.0, 98.7)    | 93.9 (92.6, 95.1)   | 4.4 (3.2, 5.8)    |
|                       |                 | 70             | 97.1 (96.4, 97.8)    | 90.3 (88.2, 92.1)   | 6.8 (4.9, 8.8)    |
|                       |                 | 80             | 92.5 (90.7, 94.2)    | 79.3 (75.5, 82.9)   | 13.1 (9.1, 17.1)  |
|                       | No Angina       | 90             | 89.2 (87.0, 91.3)    | 75.7 (72.0, 79.2)   | 13.5 (9.5, 17.6)  |
| No Angina             | 100             | 0.0 (0.0, 0.0) | 0.0 (0.0, 0.0)       | 0.0 (0.0, 0.0)      |                   |
| 36                    | Daily Angina    | 0              | 100.0 (100.0, 100.0) | 100.0 (99.9, 100.0) | 0.0 (0.0, 0.1)    |
|                       |                 | 10             | 100.0 (100.0, 100.0) | 99.9 (99.9, 100.0)  | 0.0 (0.0, 0.1)    |
|                       |                 | 20             | 99.9 (99.9, 100.0)   | 99.7 (99.6, 99.9)   | 0.2 (0.1, 0.3)    |
|                       | Weekly Angina   | 30             | 99.9 (99.9, 99.9)    | 99.7 (99.5, 99.8)   | 0.2 (0.1, 0.4)    |
|                       |                 | 40             | 99.8 (99.7, 99.8)    | 99.3 (99.0, 99.5)   | 0.5 (0.3, 0.8)    |
|                       |                 | 50             | 99.6 (99.5, 99.7)    | 98.9 (98.6, 99.2)   | 0.7 (0.4, 1.0)    |
|                       | Monthly Angina  | 60             | 98.9 (98.7, 99.1)    | 97.4 (96.9, 97.9)   | 1.5 (1.0, 2.0)    |
|                       |                 | 70             | 97.8 (97.4, 98.3)    | 95.6 (94.7, 96.4)   | 2.2 (1.4, 3.1)    |
|                       |                 | 80             | 94.0 (92.8, 95.2)    | 89.3 (87.3, 91.1)   | 4.7 (2.5, 6.9)    |
|                       | No Angina       | 90             | 91.3 (89.8, 92.7)    | 85.1 (82.8, 87.2)   | 6.2 (3.7, 8.6)    |
| No Angina             | 100             | 0.0 (0.0, 0.0) | 0.0 (0.0, 0.0)       | 0.0 (0.0, 0.0)      |                   |

Probability of Improvement  $\geq$  20 Points (95% Credible Interval) in SAQ-7 Angina Frequency Score, as function of Baseline Angina Frequency over time

| Baseline SAQ-7 Angina |                 |                | Invasive             | Conservative       | Difference        |
|-----------------------|-----------------|----------------|----------------------|--------------------|-------------------|
| Month                 | Frequency Score |                |                      |                    |                   |
| 3                     | Daily Angina    | 0              | 99.9 (99.8, 100.0)   | 99.5 (99.1, 99.8)  | 0.4 (0.1, 0.8)    |
|                       |                 | 10             | 99.6 (99.3, 99.8)    | 97.8 (96.3, 99.1)  | 1.8 (0.5, 3.3)    |
|                       |                 | 20             | 99.5 (99.2, 99.8)    | 97.3 (95.7, 98.6)  | 2.2 (0.8, 3.7)    |
|                       | Weekly Angina   | 30             | 98.8 (98.3, 99.3)    | 94.3 (91.7, 96.5)  | 4.5 (2.2, 7.1)    |
|                       |                 | 40             | 98.3 (97.8, 98.9)    | 92.2 (89.5, 94.5)  | 6.2 (3.8, 8.8)    |
|                       |                 | 50             | 96.0 (95.0, 96.9)    | 83.1 (79.6, 86.5)  | 12.9 (9.5, 16.7)  |
|                       | Monthly Angina  | 60             | 93.3 (92.0, 94.6)    | 74.4 (70.9, 78.0)  | 18.9 (15.2, 22.7) |
|                       |                 | 70             | 82.0 (79.0, 84.9)    | 50.1 (45.7, 54.5)  | 32.0 (26.7, 37.3) |
|                       |                 | 80             | 68.8 (64.3, 73.7)    | 36.4 (32.1, 40.8)  | 32.4 (26.0, 38.7) |
|                       | No Angina       | 90             | 0.0 (0.0, 0.0)       | 0.0 (0.0, 0.0)     | 0.0 (0.0, 0.0)    |
|                       | 100             | 0.0 (0.0, 0.0) | 0.0 (0.0, 0.0)       | 0.0 (0.0, 0.0)     |                   |
| 12                    | Daily Angina    | 0              | 100.0 (99.9, 100.0)  | 99.8 (99.6, 100.0) | 0.2 (0.0, 0.4)    |
|                       |                 | 10             | 99.8 (99.7, 99.9)    | 99.1 (98.4, 99.7)  | 0.7 (0.1, 1.5)    |
|                       |                 | 20             | 99.8 (99.6, 99.9)    | 98.9 (98.2, 99.5)  | 0.9 (0.3, 1.7)    |
|                       | Weekly Angina   | 30             | 99.5 (99.2, 99.7)    | 97.6 (96.2, 98.6)  | 1.9 (0.8, 3.3)    |
|                       |                 | 40             | 99.2 (98.9, 99.5)    | 96.6 (95.2, 97.8)  | 2.6 (1.3, 4.0)    |
|                       |                 | 50             | 97.9 (97.3, 98.5)    | 92.1 (90.0, 94.1)  | 5.9 (3.8, 8.1)    |
|                       | Monthly Angina  | 60             | 96.3 (95.5, 97.1)    | 87.1 (84.5, 89.4)  | 9.2 (6.8, 11.9)   |
|                       |                 | 70             | 89.0 (86.6, 91.3)    | 69.4 (64.8, 73.8)  | 19.7 (14.7, 24.6) |
|                       |                 | 80             | 79.6 (75.4, 83.4)    | 54.9 (48.9, 60.1)  | 24.7 (17.8, 31.2) |
|                       | No Angina       | 90             | 0.0 (0.0, 0.0)       | 0.0 (0.0, 0.0)     | 0.0 (0.0, 0.0)    |
|                       | 100             | 0.0 (0.0, 0.0) | 0.0 (0.0, 0.0)       | 0.0 (0.0, 0.0)     |                   |
| 36                    | Daily Angina    | 0              | 100.0 (100.0, 100.0) | 99.9 (99.9, 100.0) | 0.1 (0.0, 0.1)    |
|                       |                 | 10             | 99.9 (99.9, 100.0)   | 99.7 (99.4, 99.9)  | 0.3 (0.1, 0.5)    |
|                       |                 | 20             | 99.9 (99.8, 100.0)   | 99.6 (99.3, 99.8)  | 0.3 (0.1, 0.6)    |
|                       | Weekly Angina   | 30             | 99.7 (99.6, 99.8)    | 99.0 (98.6, 99.4)  | 0.7 (0.3, 1.2)    |
|                       |                 | 40             | 99.6 (99.4, 99.7)    | 98.6 (98.1, 99.0)  | 1.0 (0.5, 1.5)    |
|                       |                 | 50             | 98.7 (98.4, 99.0)    | 96.6 (95.7, 97.4)  | 2.1 (1.3, 3.0)    |
|                       | Monthly Angina  | 60             | 97.5 (97.0, 97.9)    | 94.2 (93.1, 95.2)  | 3.3 (2.2, 4.4)    |
|                       |                 | 70             | 91.6 (90.1, 93.1)    | 84.1 (81.6, 86.6)  | 7.5 (4.6, 10.4)   |
|                       |                 | 80             | 83.2 (80.3, 86.1)    | 72.6 (68.5, 76.5)  | 10.6 (5.7, 15.2)  |
|                       | No Angina       | 90             | 0.0 (0.0, 0.0)       | 0.0 (0.0, 0.0)     | 0.0 (0.0, 0.0)    |
|                       | 100             | 0.0 (0.0, 0.0) | 0.0 (0.0, 0.0)       | 0.0 (0.0, 0.0)     |                   |

13 Supplement 7 – the 7-item Seattle Angina Questionnaire

**The Seattle Angina Questionnaire-7**

1. The following is a list of activities that people often do during the week. Although for some people with several medical problems it is difficult to determine what it is that limits them, please go over the activities listed below and indicate how much limitation you have had **due to chest pain, chest tightness or angina over the past 4 weeks**.

Place an X in one box on each line.

| Activity                                                      | Extremely limited        | Quite a bit limited      | Moderately Limited       | Slightly limited         | Not at all limited       | Limited for other reasons or did not do the activity |
|---------------------------------------------------------------|--------------------------|--------------------------|--------------------------|--------------------------|--------------------------|------------------------------------------------------|
| a. Walking indoors on level ground                            | <input type="checkbox"/>                             |
| b. Gardening, vacuuming or carrying groceries                 | <input type="checkbox"/>                             |
| c. Lifting or moving heavy objects (e.g. furniture, children) | <input type="checkbox"/>                             |

2. Over the past 4 weeks, on average, how many times have you had **chest pain, chest tightness or angina**?

I have had **chest pain, chest tightness or angina**...

|                          |                          |                                            |                          |                          |                            |
|--------------------------|--------------------------|--------------------------------------------|--------------------------|--------------------------|----------------------------|
| 4 or more times per day  | 1-3 times per day        | 3 or more times per week but not every day | 1-2 times per week       | Less than once a week    | None over the past 4 weeks |
| <input type="checkbox"/> | <input type="checkbox"/> | <input type="checkbox"/>                   | <input type="checkbox"/> | <input type="checkbox"/> | <input type="checkbox"/>   |

3. Over the past 4 weeks, on average, how many times have you had to take nitroglycerin (nitroglycerin tablets or spray) for your **chest pain, chest tightness or angina**?

I have taken nitroglycerin...

|                          |                          |                                            |                          |                          |                            |
|--------------------------|--------------------------|--------------------------------------------|--------------------------|--------------------------|----------------------------|
| 4 or more times per day  | 1-3 times per day        | 3 or more times per week but not every day | 1-2 times per week       | Less than once a week    | None over the past 4 weeks |
| <input type="checkbox"/> | <input type="checkbox"/> | <input type="checkbox"/>                   | <input type="checkbox"/> | <input type="checkbox"/> | <input type="checkbox"/>   |

4. Over the past 4 weeks, how much has your **chest pain, chest tightness or angina** limited your enjoyment of life?

|                                                      |                                                        |                                                       |                                                     |                                                       |
|------------------------------------------------------|--------------------------------------------------------|-------------------------------------------------------|-----------------------------------------------------|-------------------------------------------------------|
| It has <b>extremely</b> limited my enjoyment of life | It has limited my enjoyment of life <b>quite a bit</b> | It has <b>moderately</b> limited my enjoyment of life | It has <b>slightly</b> limited my enjoyment of life | It has <b>not</b> limited my enjoyment of life at all |
| <input type="checkbox"/>                             | <input type="checkbox"/>                               | <input type="checkbox"/>                              | <input type="checkbox"/>                            | <input type="checkbox"/>                              |

5. If you had to spend the rest of your life with your **chest pain, chest tightness or angina** the way it is right now, how would you feel about this?

|                                               |                                              |                                             |                                           |                                               |
|-----------------------------------------------|----------------------------------------------|---------------------------------------------|-------------------------------------------|-----------------------------------------------|
| <input type="checkbox"/> Not satisfied at all | <input type="checkbox"/> Mostly dissatisfied | <input type="checkbox"/> Somewhat satisfied | <input type="checkbox"/> Mostly satisfied | <input type="checkbox"/> Completely satisfied |
|-----------------------------------------------|----------------------------------------------|---------------------------------------------|-------------------------------------------|-----------------------------------------------|
